# Supplementary material for: Genome-wide association study identifies variation at 6q25.1 associated with survival in multiple myeloma
Source: PubMed Central journal article supplement (PMC4729868; doi:10.1038/ncomms10290), 2016-01-08
Supplement: ncomms10290-s1.pdf [file ncomms10290-s1.pdf]

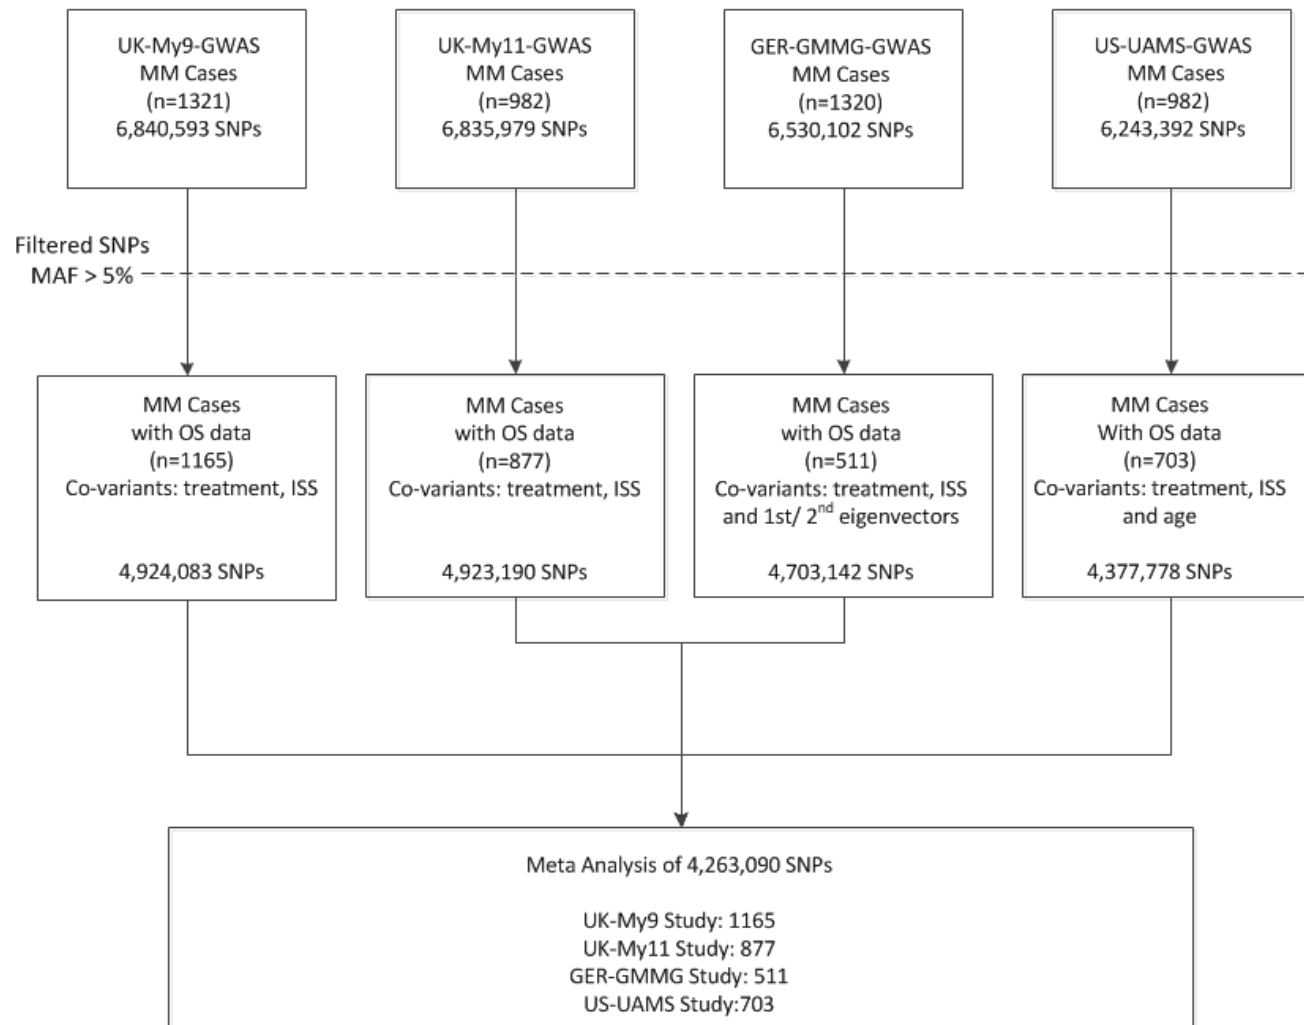

Supplementary Figure 1: GWAS data quality control.

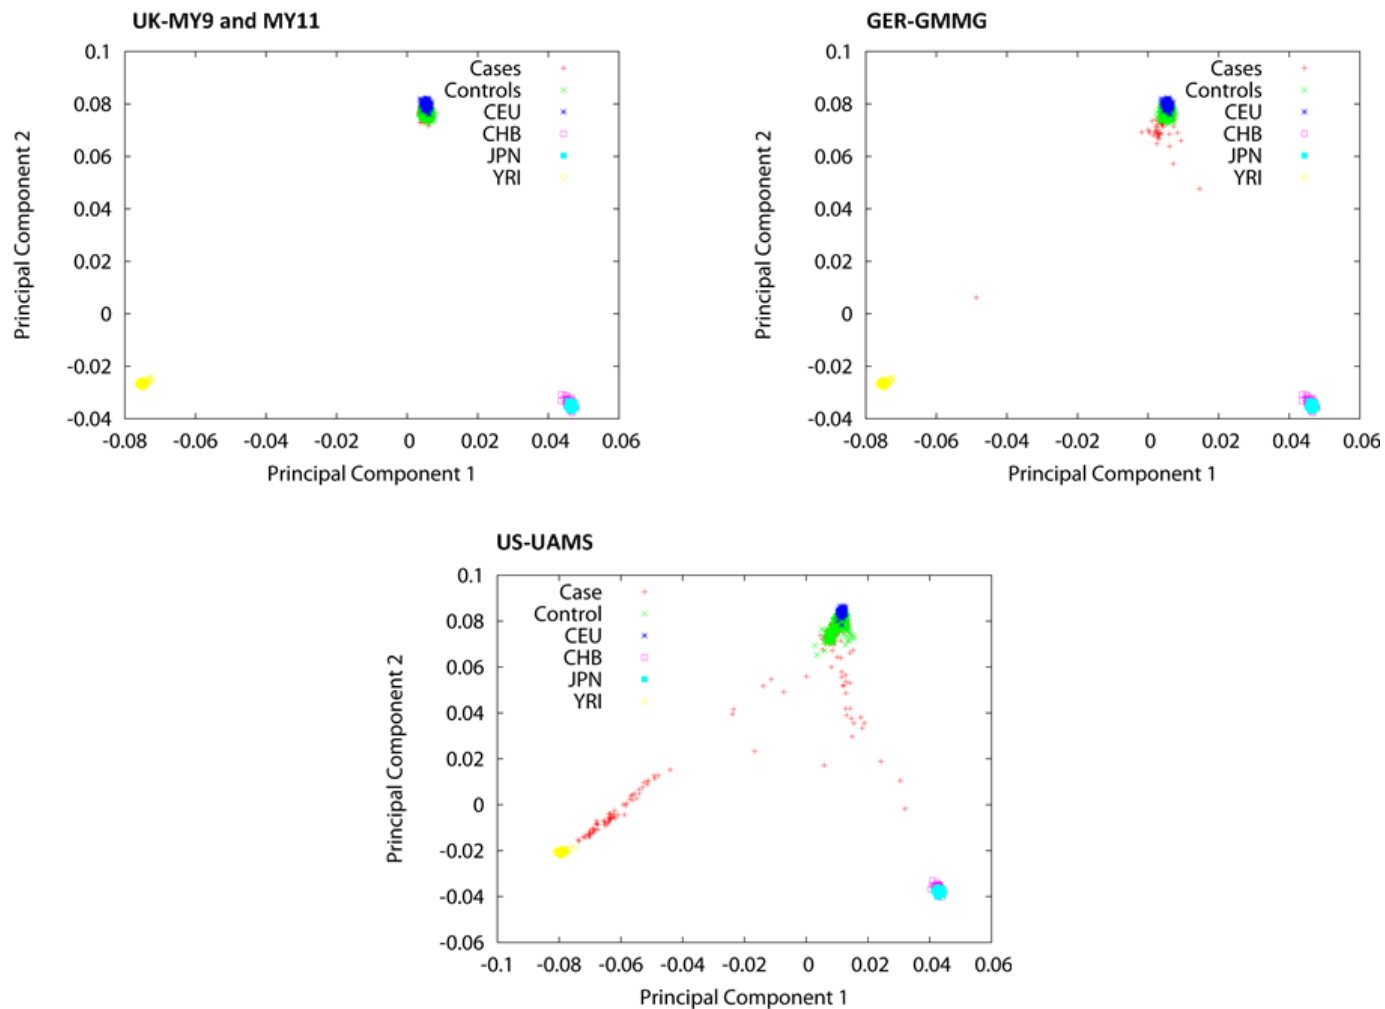

**Supplementary Figure 2: Identification of samples of non-European origin.** The first two principal components of the analysis were plotted for German-GWA. (a) HapMap CEU individuals are plotted in blue; CHB+JPT individuals are plotted in green; YRI individuals are plotted in red; GWAS cases are plotted in black and controls are plotted in purple. (b) The same plot is shown after the removal of cases and controls of non-European origin.

**UK-My9**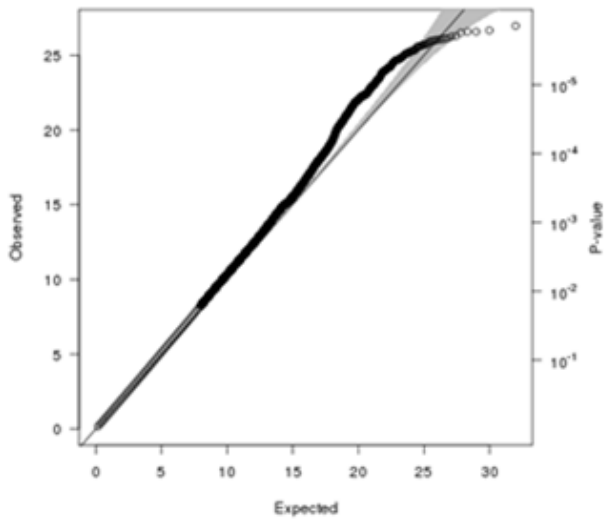**UK-My11**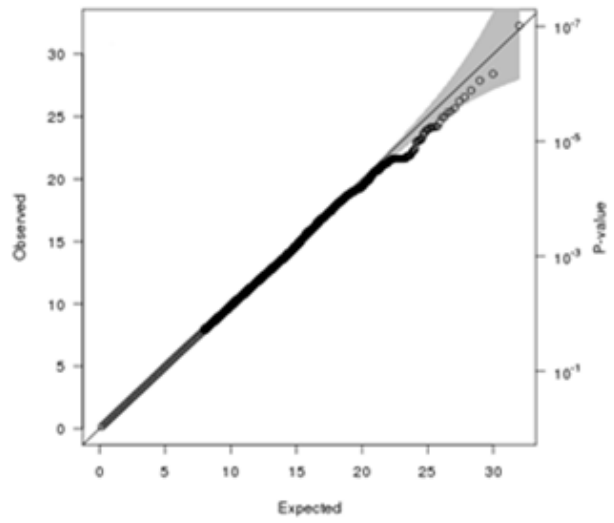**GER-GMMG**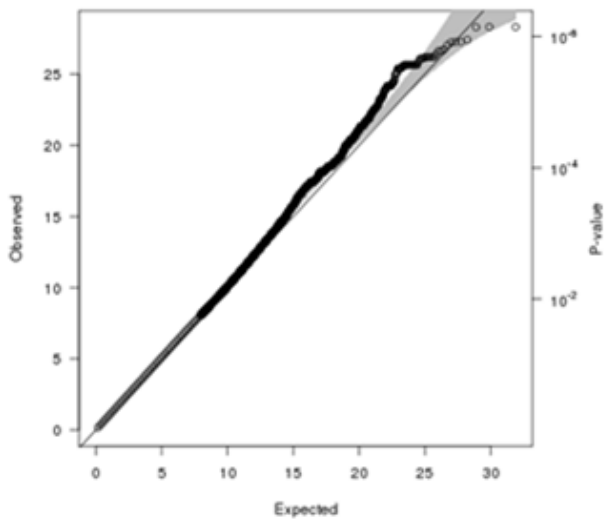 $\lambda = 1.02, n=4,703,142$ **US-UAMS**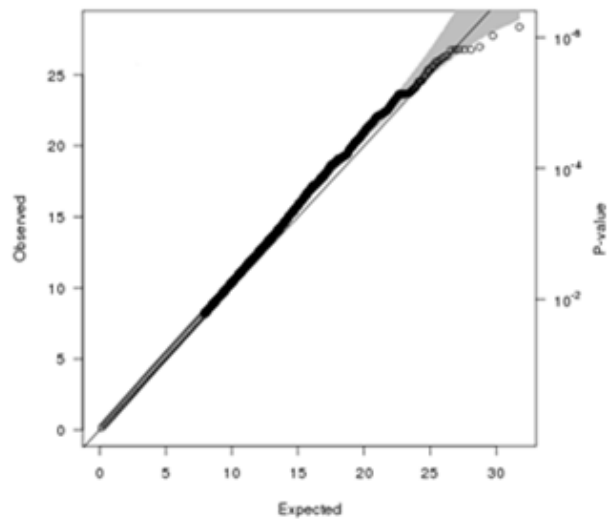 $\lambda = 1.03, n=4,377,778$ 

**Supplementary Figure 3:** Quantile-Quantile (Q-Q) plot for the four patient cohort analyses. The y-axis corresponds to the observed  $-\log_{10} P$ -value, and the x-axis the expected  $-\log_{10} P$ -value. The red line represents the expected distribution under the null hypothesis of no association. All statistical tests were two-sided.

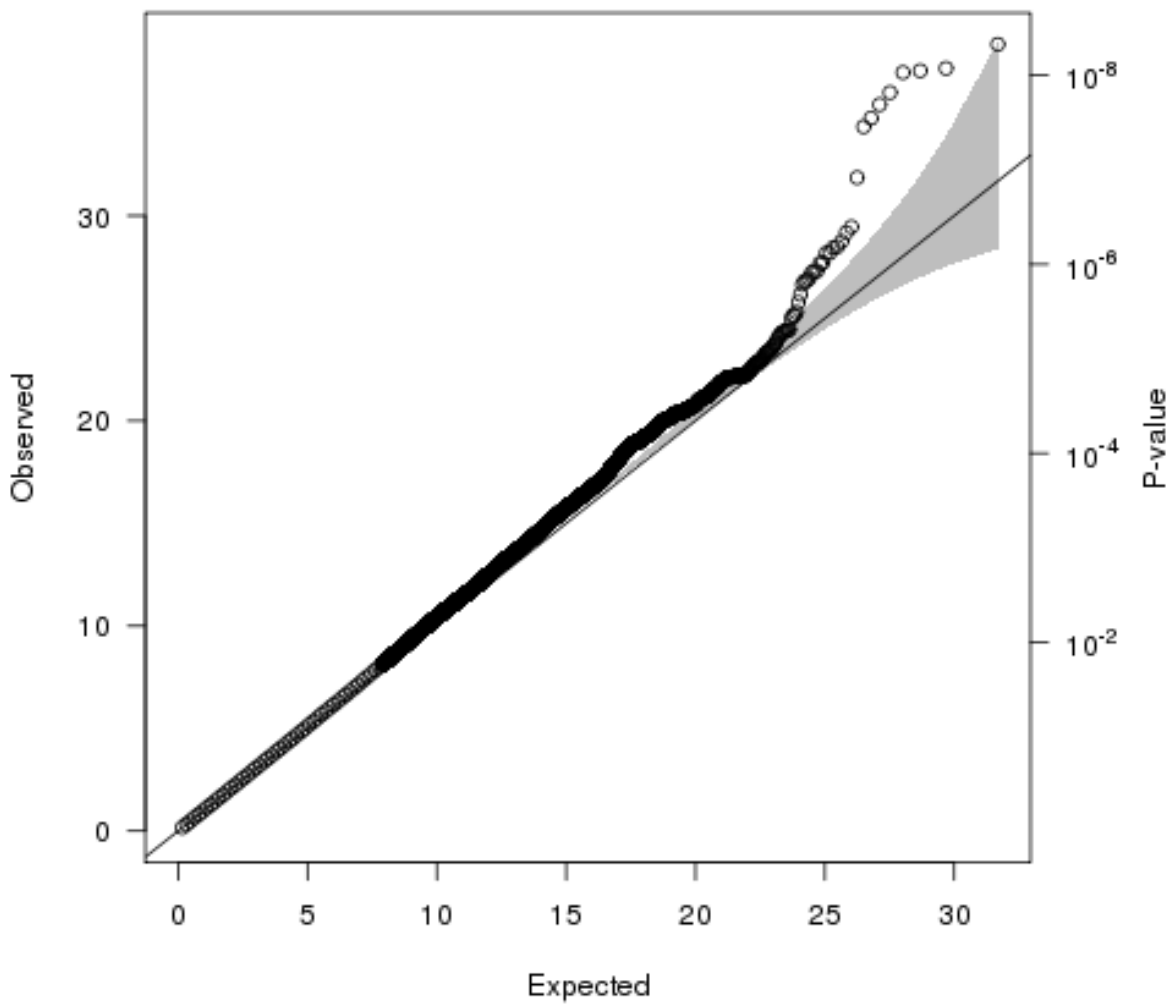

$\lambda = 1.01$ ,  $n = 4,263,089$

**Supplementary Figure 4:** Quantile-Quantile (Q-Q) plot for the combined analyses. The y-axis corresponds to the observed  $-\log_{10} P$ -value, and the x-axis the expected  $-\log_{10} P$ -value. The red line represents the expected distribution under the null hypothesis of no association. All statistical tests were two-sided.

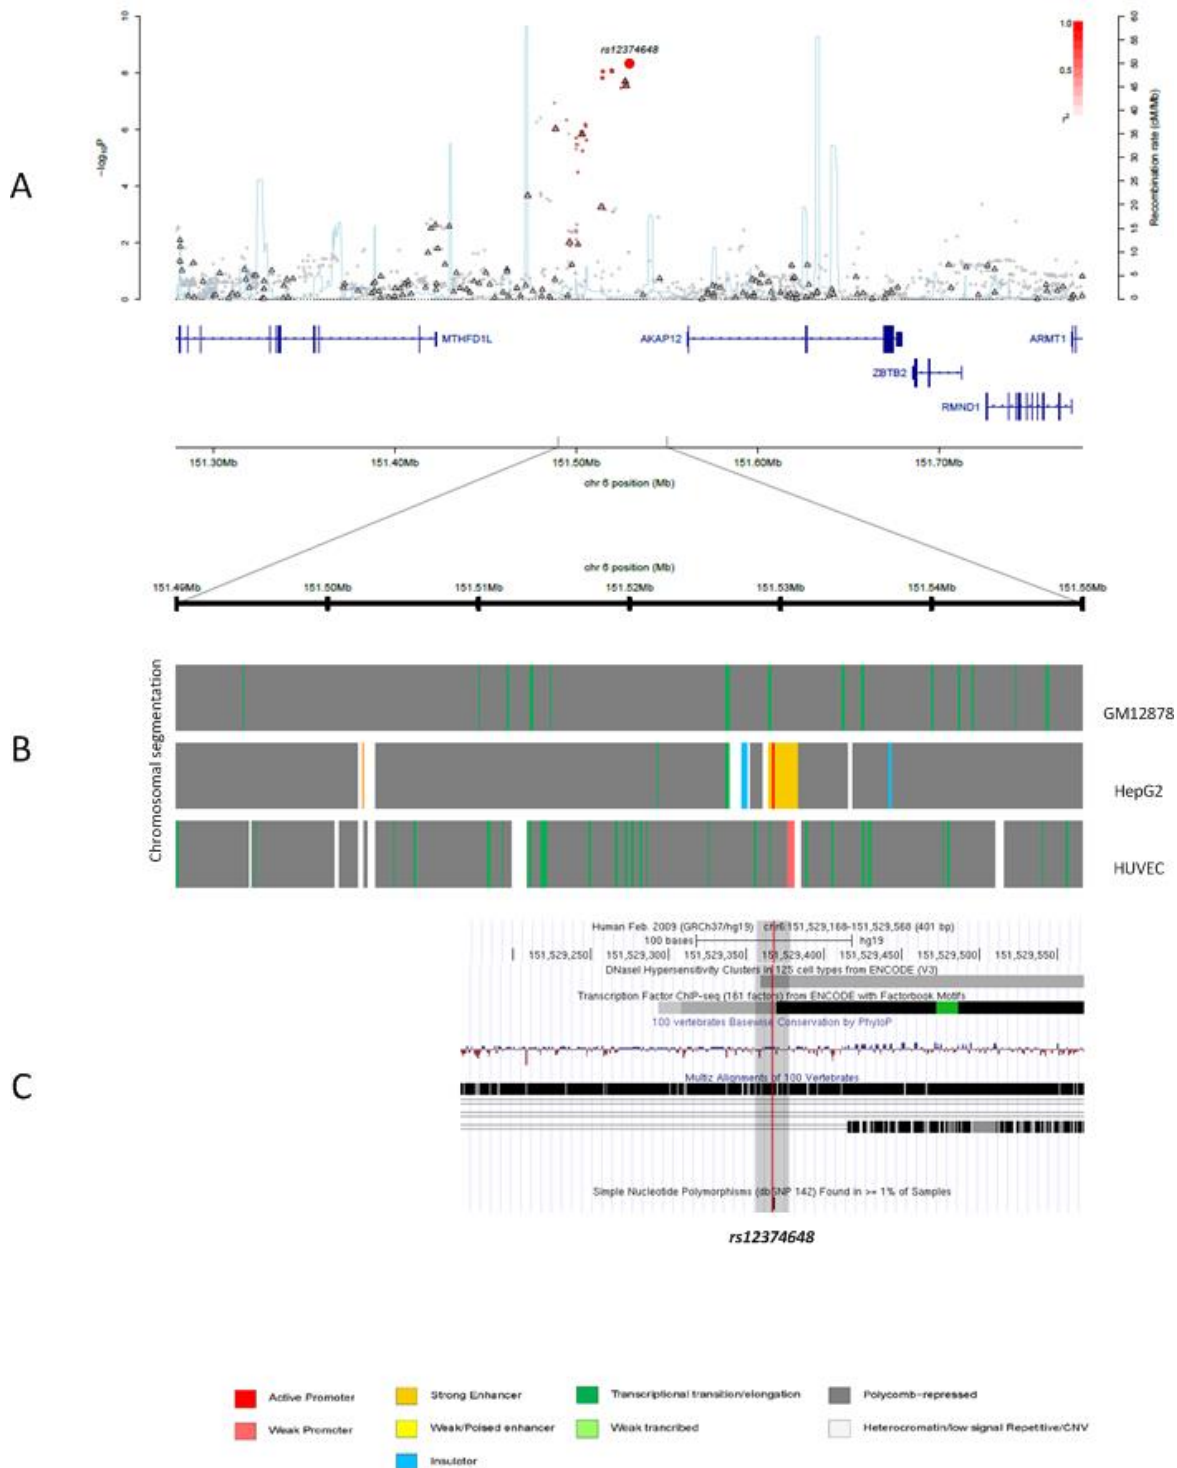

**Supplementary Figure 5:** Regional plot of association results and recombination rates for the rs12374648 (6q25.1) MM-OS risk locus annotated with ENCODE data. A) Plots show association results of both genotyped (triangles) and imputed (circles) SNPs in the GWAS samples and recombination rates.  $-\log_{10} P$  values (y axes) of the SNPs are shown according to their chromosomal positions (x axes). B) Chromatin state segmentation tracks (Combined) for Lymphoblast (GM12878), human liver carcinoma (HepG2) and Human Umbilical Vein Endothelial Cells (HUVEC) cell lines, data derived from the ENCODE project. C. RegulomeDB results for rs12374648.

a) UK-My9

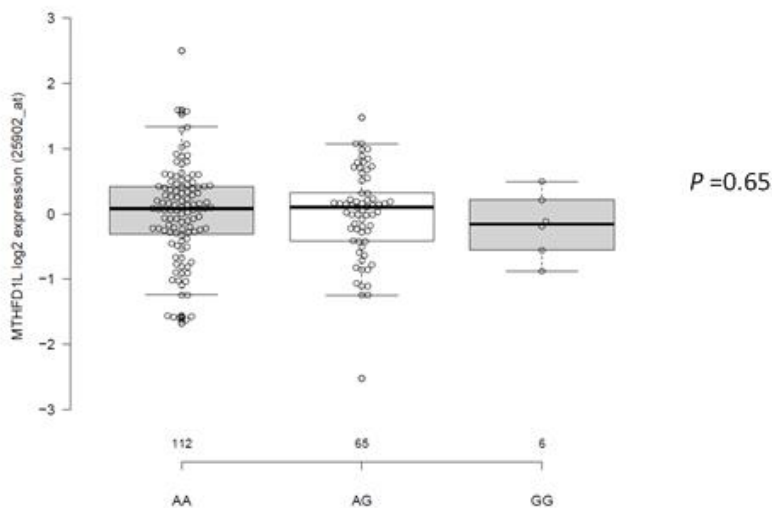

b) GER-GMMG

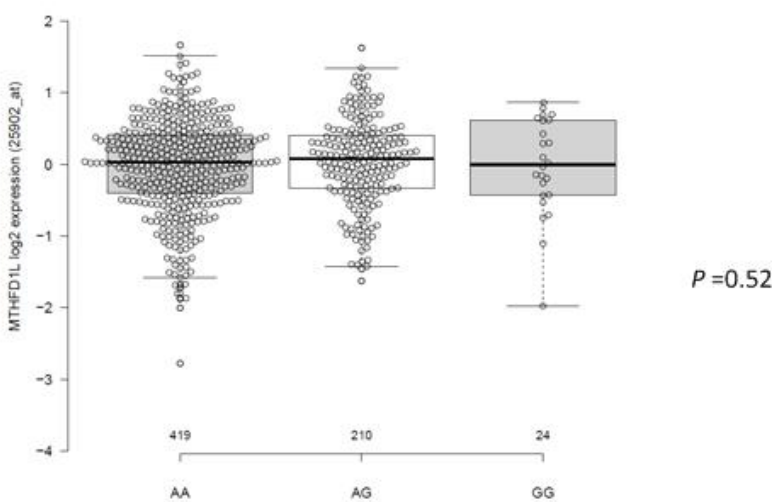

c) US-UAMS

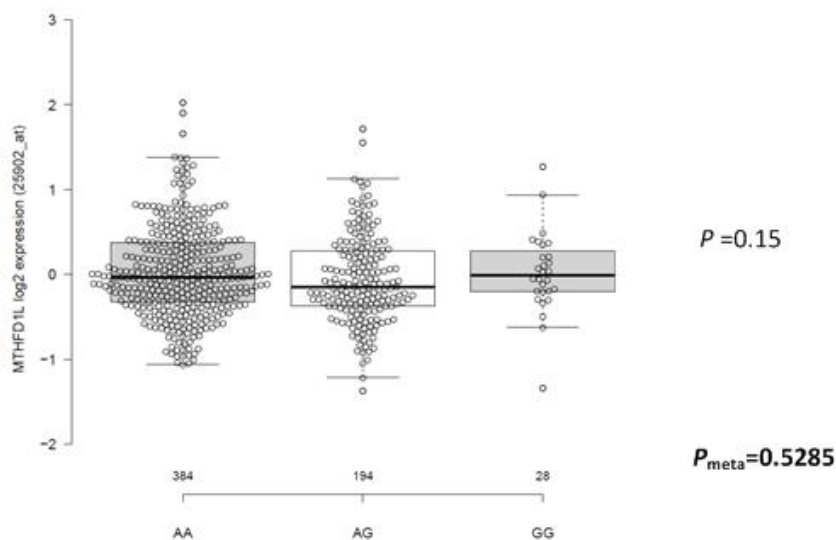

**Supplementary Figure 6: Relationship between rs12374648 genotypes and expression at *MTHFD1L*.** Box plots show relationship of SNP genotype with Log<sub>2</sub> (gene expression). The central line in each box is the median, the bottom and top of the box are the first and third quartiles. The notches on each box are  $\pm 1.58 \times \text{interquartile range} / \sqrt{n}$ , defining the 95% confidence where the median are different. Bee swarm arranged circles are the data-points.

a) UK-My9

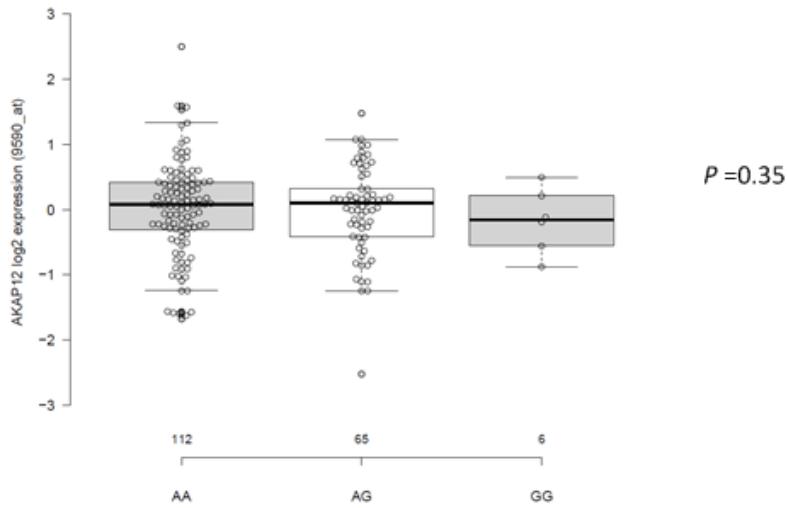

b) GER-GMMG

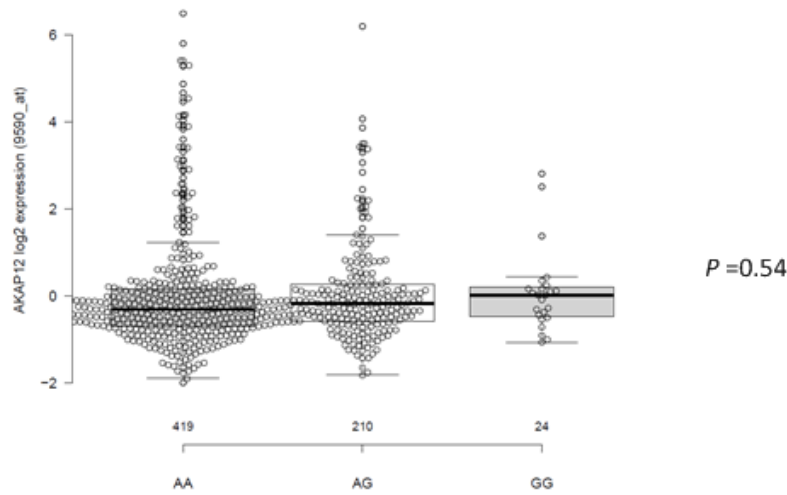

c) US-UAMS

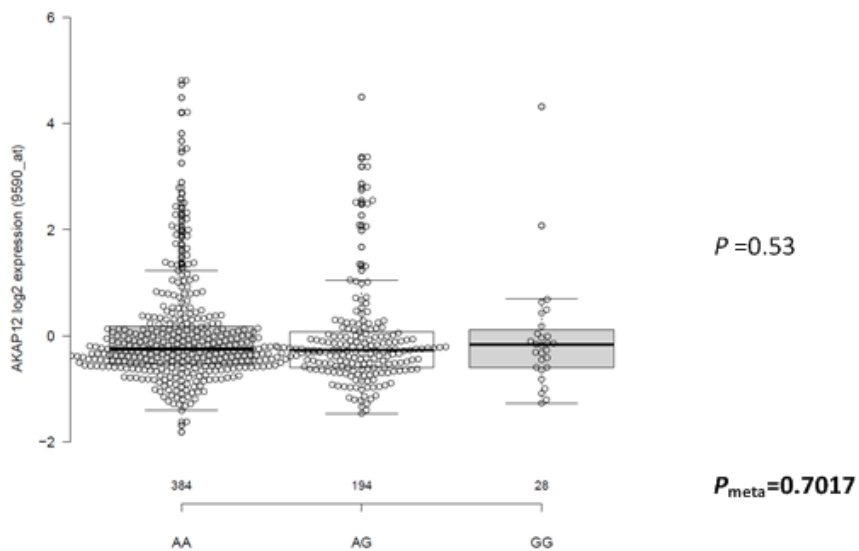

**Supplementary Figure 7: Relationship between rs12374648 and expression at AKAP12.** Box plots show relationship of SNP genotype with Log<sub>2</sub> (gene expression). The central line in each box is the median, the bottom and top of the box are the first and third quartiles. The notches on each box are  $\pm 1.58 \times \text{interquartile range} / \sqrt{n}$ , defining the 95% confidence where the median are different. Bee swarm arranged circles are the data-points.

a) *AKAP12* (cg25529303)

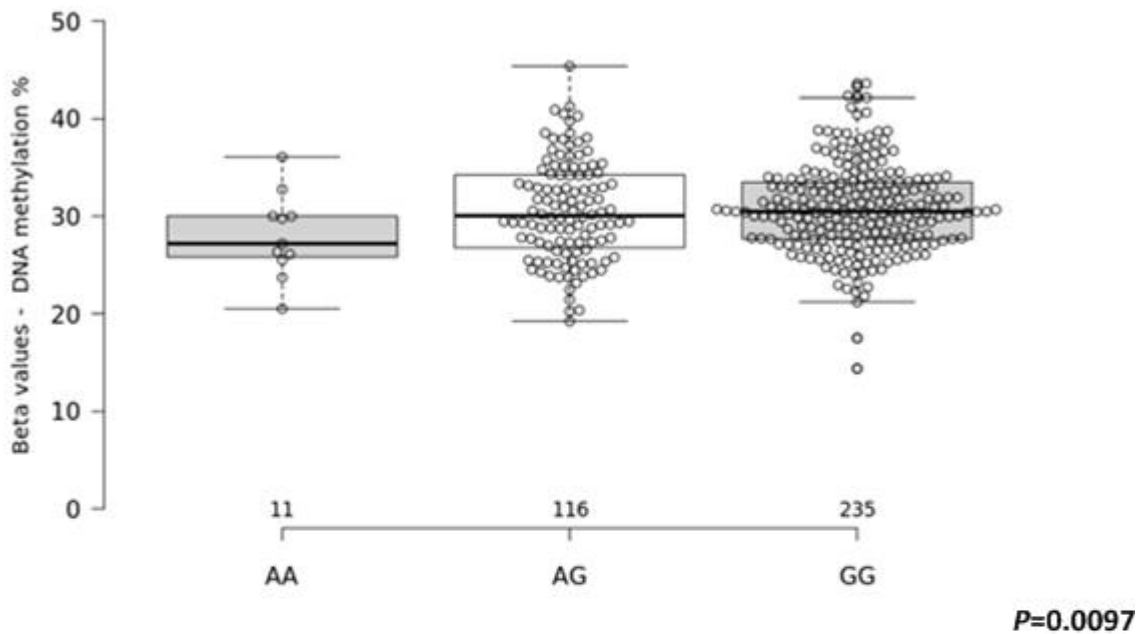

b) *MTHFD1L* (cg09070799)

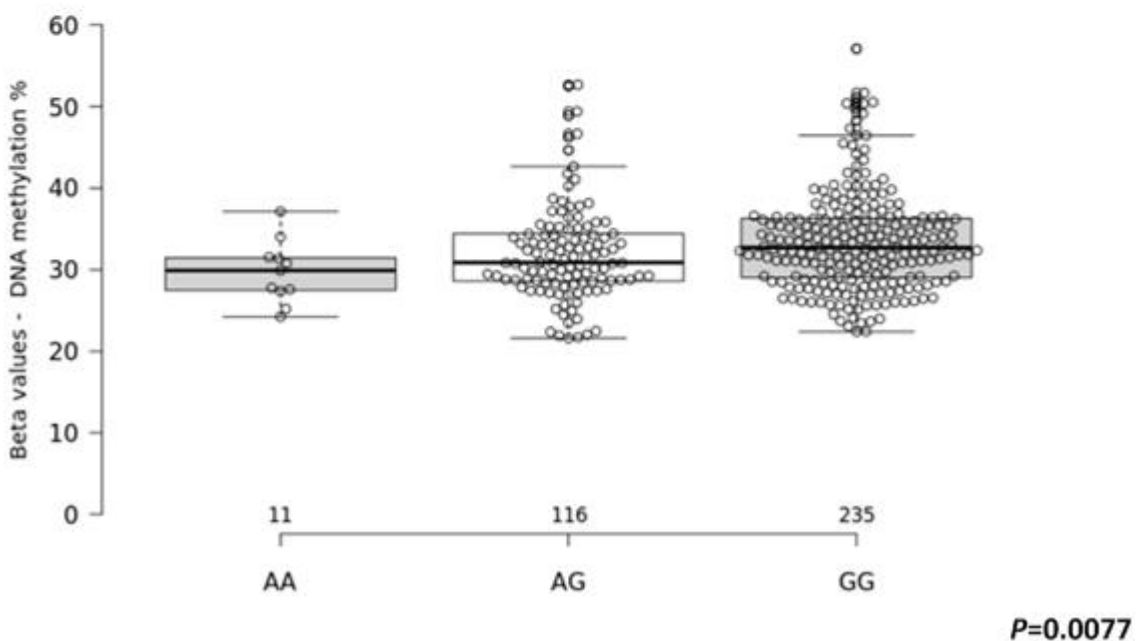

**Supplementary Figure 8: Relationship between rs12374648 and DNA methylation at 6p25.1.** Box plots show relationship of SNP genotype with  $\text{Log}_2$  (DNA methylation) in the UK-My11 patients. The central line in each box is the median, the bottom and top of the box are the first and third quartiles. The notches on each box are  $\pm 1.58 \times \text{interquartile range} / \sqrt{n}$ , defining the 95% confidence where the median are different. Bee swarm arranged circles are the data-points.



a) UK-My9

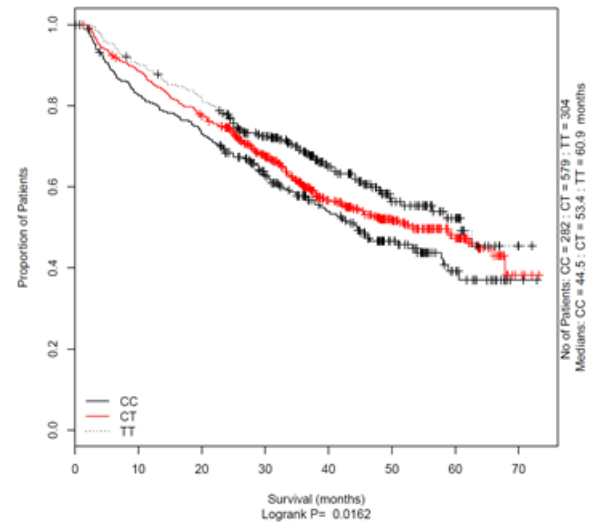

b) UK-My11

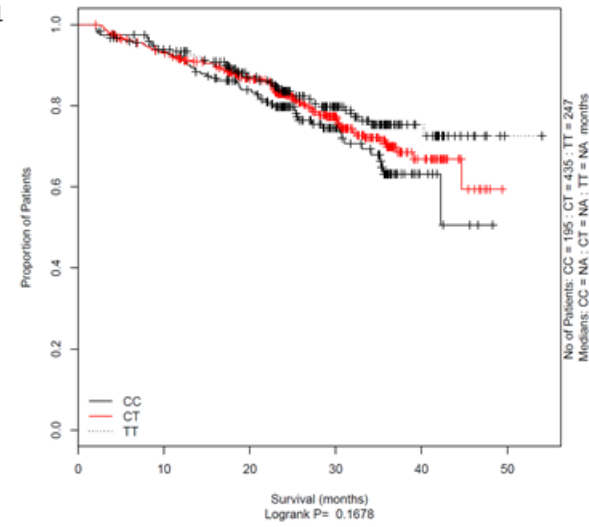

c) GER-GMMG

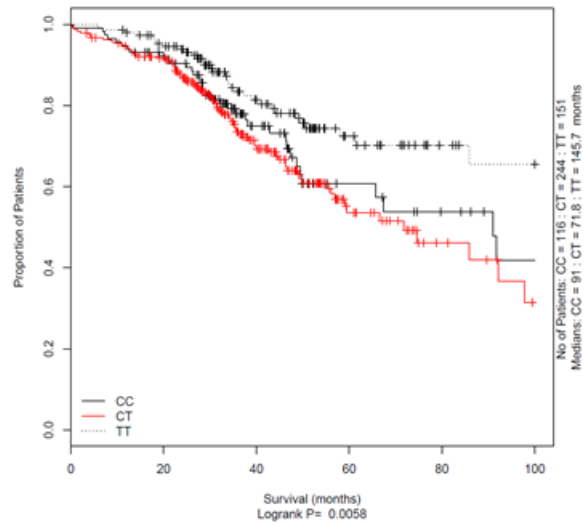

d) US-UAMS

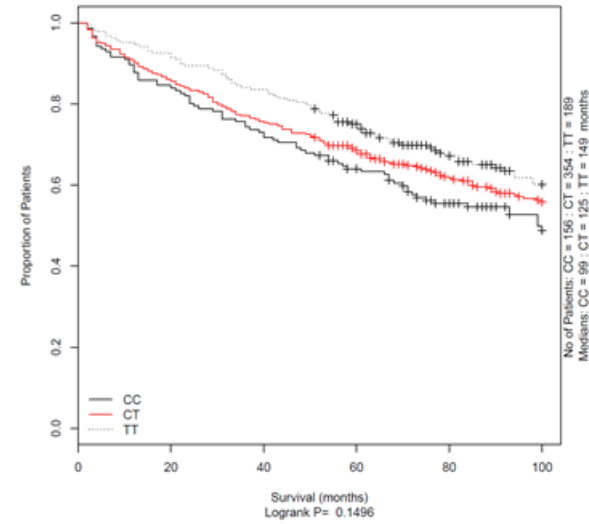

Supplementary Figure 9: Kaplan–Meier curves for 1q23.3 (rs1934908) and MM-OS. Vertical ticks indicate censored data-points.

a) UK-My9

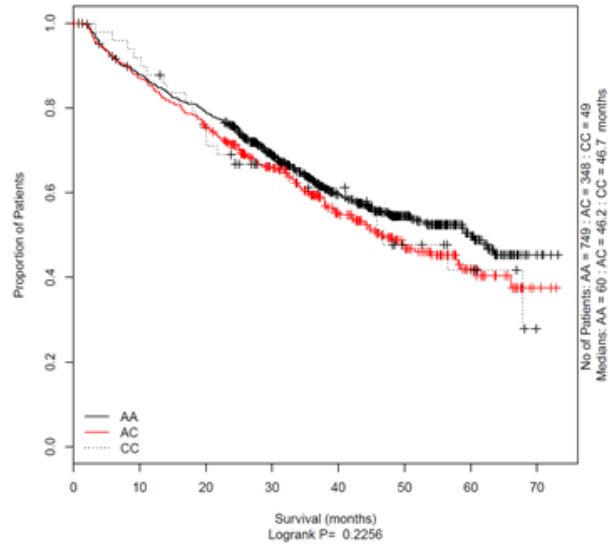

b) UK-My11

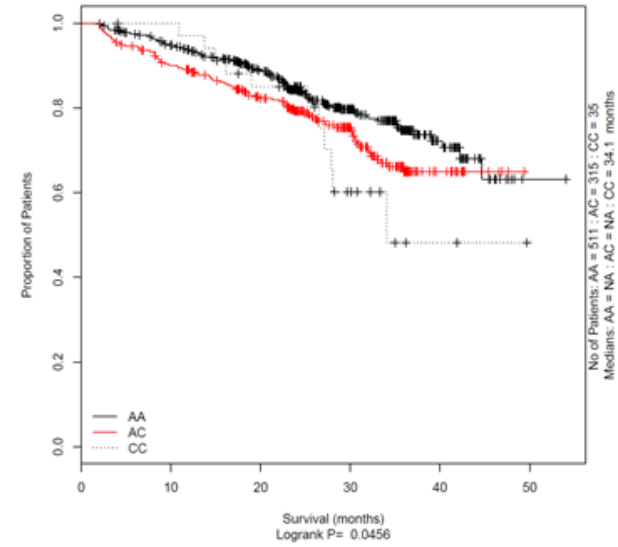

c) GER-GMMG

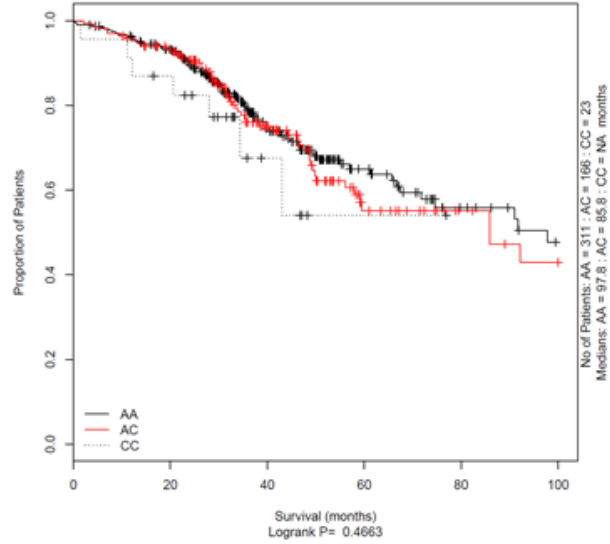

d) US-UAMS

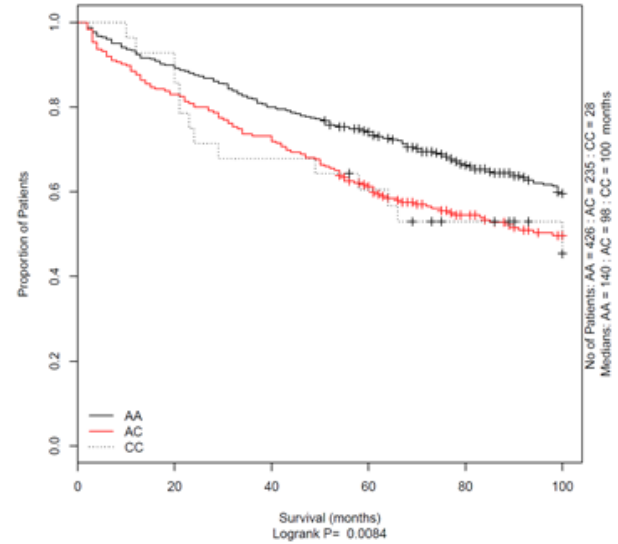

Supplementary Figure 10: Kaplan–Meier curves for 19q13.11 (rs1974807) for MM-OS. Vertical ticks indicate censored data-points.

a) UK-My9

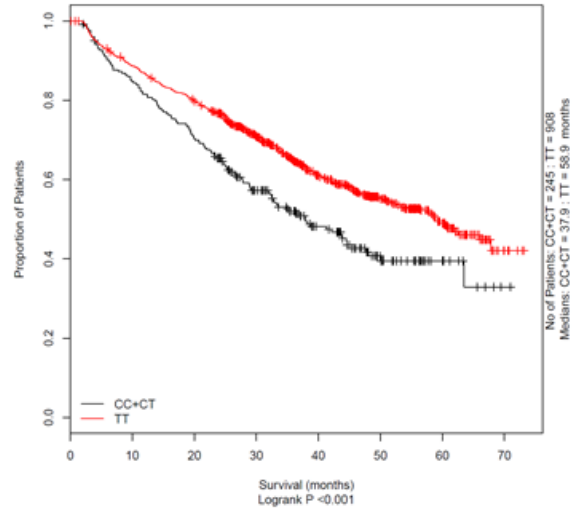

b) UK-My11

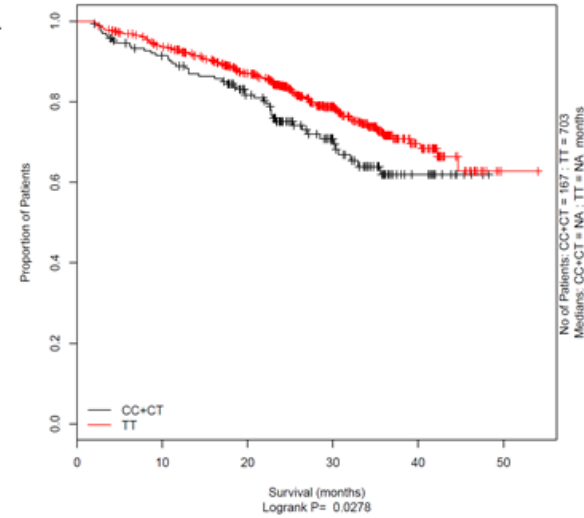

c) GER-GMMG

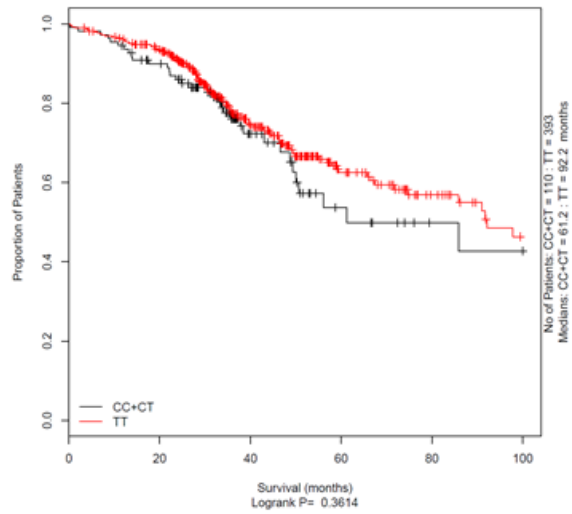

d) US-UAMS

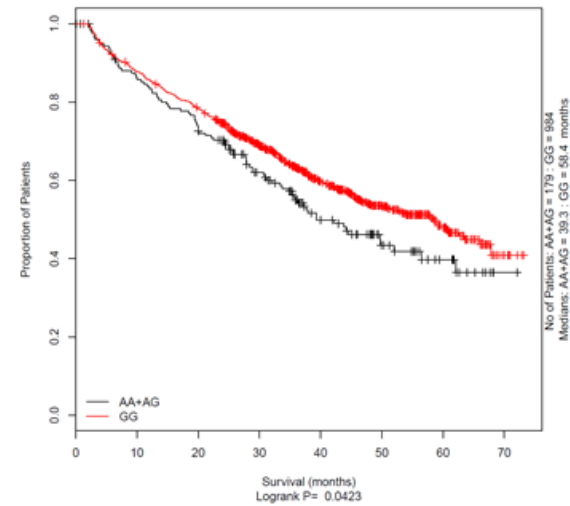

**Supplementary Figure 11: Kaplan–Meier curves for 3q13.31 (rs4682170) and MM-OS.** Vertical ticks indicate censored data-points.

a) UK-My9

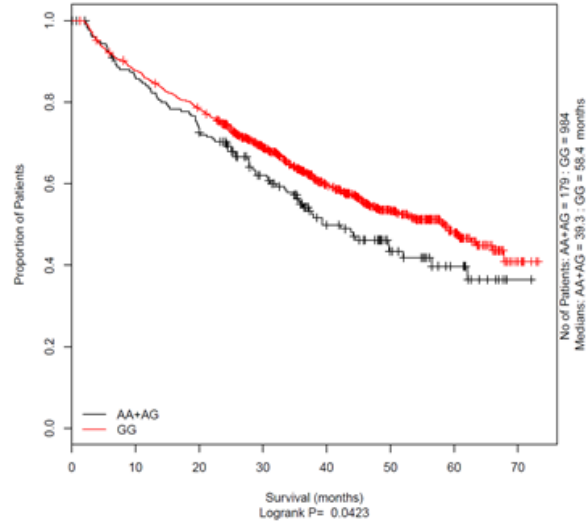

b) UK-My11

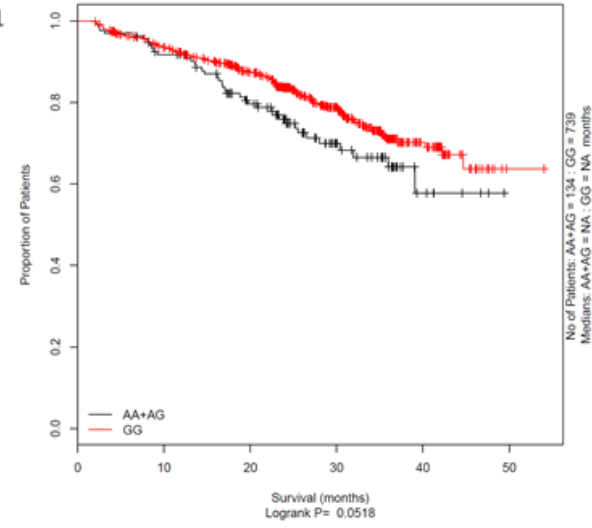

c) GER-GMMG

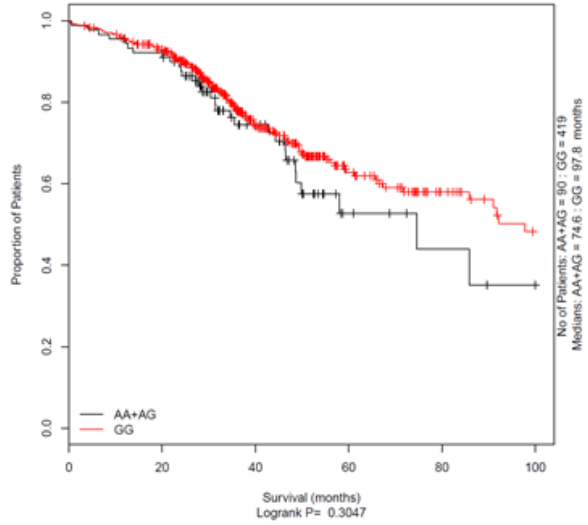

d) US-UAMS

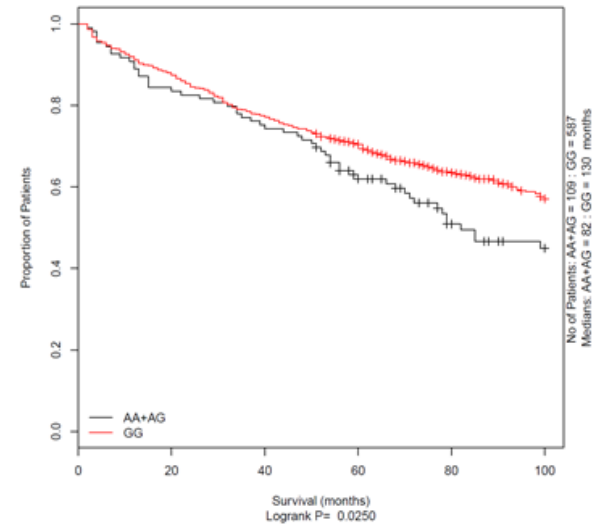

Supplementary Figure 12: Kaplan–Meier curves for 18q21.32 (rs57942319) for MM-OS. Vertical ticks indicate censored data-points.

a) UK-My9

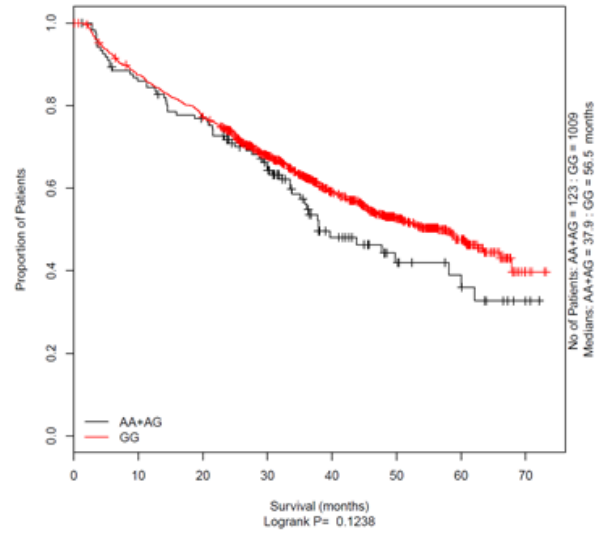

b) UK-My11

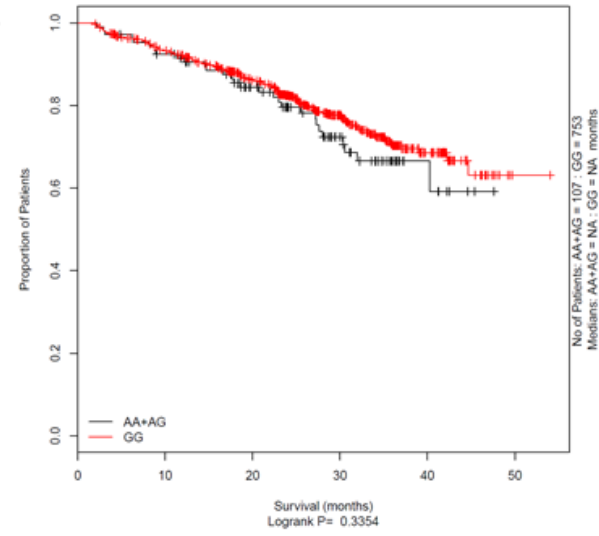

c) GER-GMMG

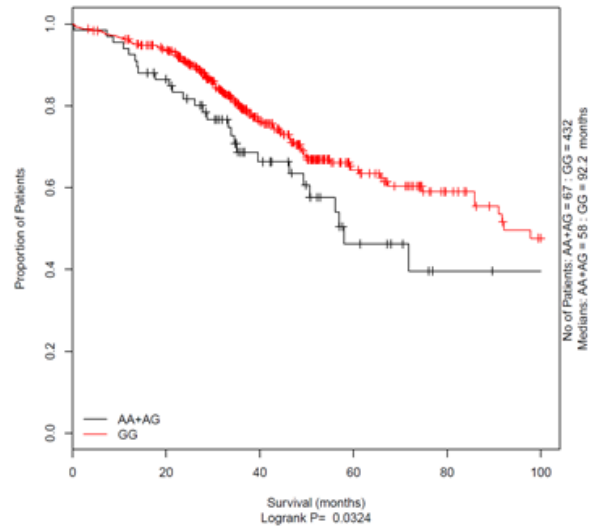

d) US-UAMS

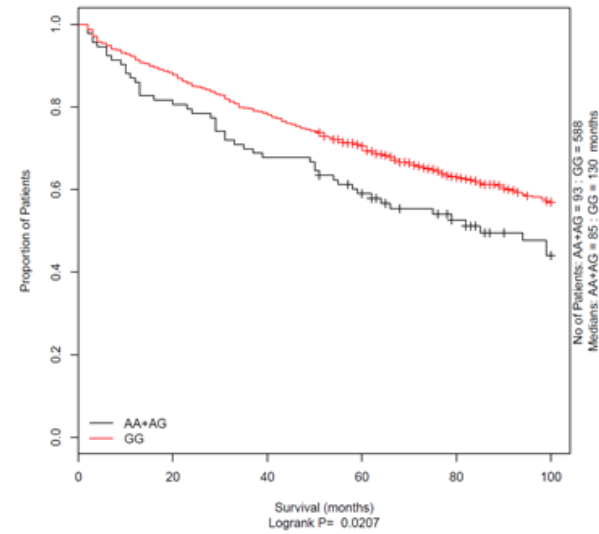

Supplementary Figure 13: Kaplan–Meier curves for 2q22.1 (rs61070260) and MM-OS. Vertical ticks indicate censored data-points.

a) UK-My9

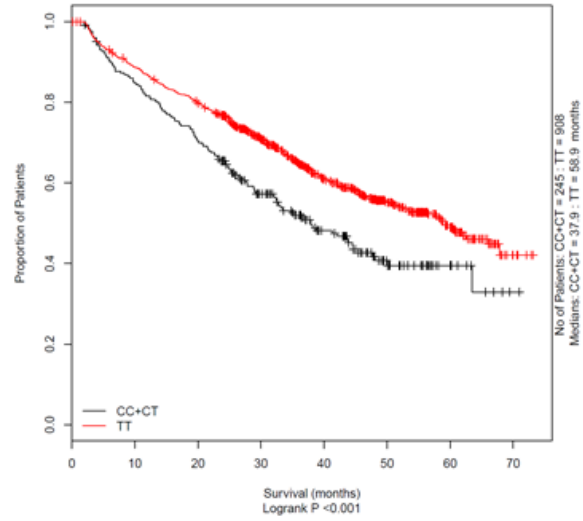

b) UK-My11

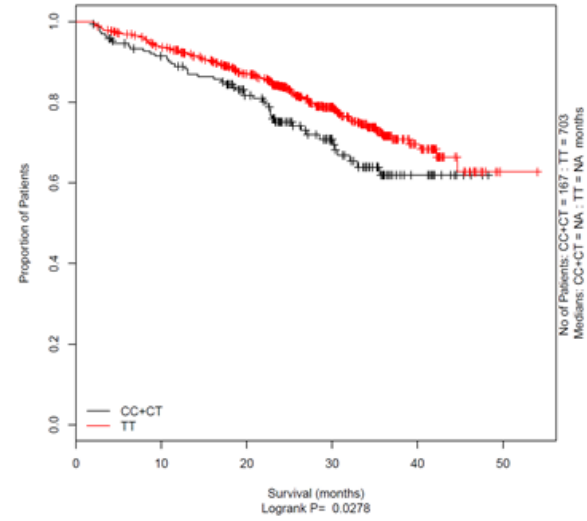

c) GER-GMMG

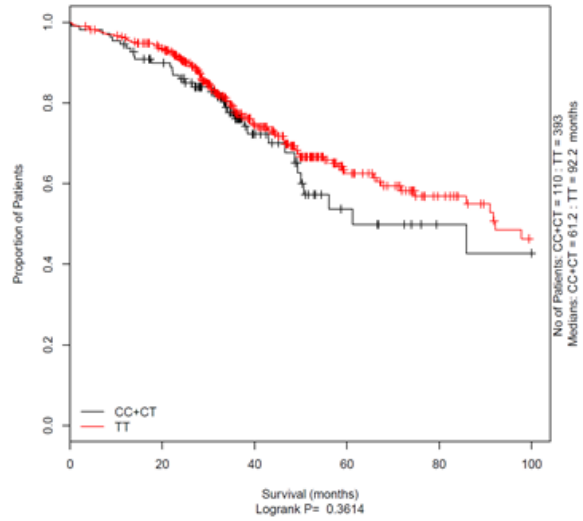

d) US-UAMS

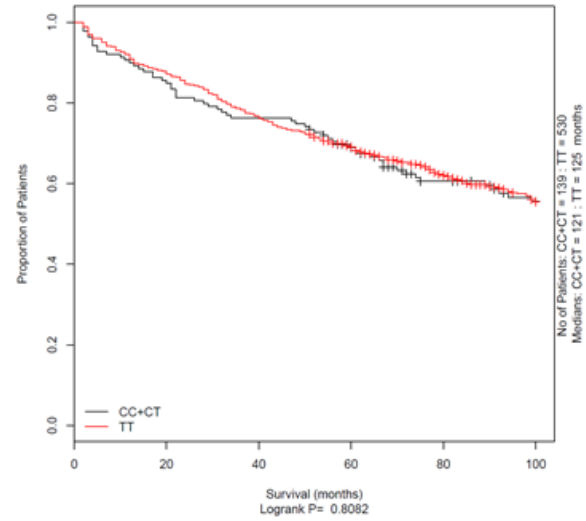

**Supplementary Figure 14: Kaplan–Meier curves for 5q31.3 (rs2906053) and MM-OS. Vertical ticks indicate censored data-points.**

## 1q23.3 (rs1934908)

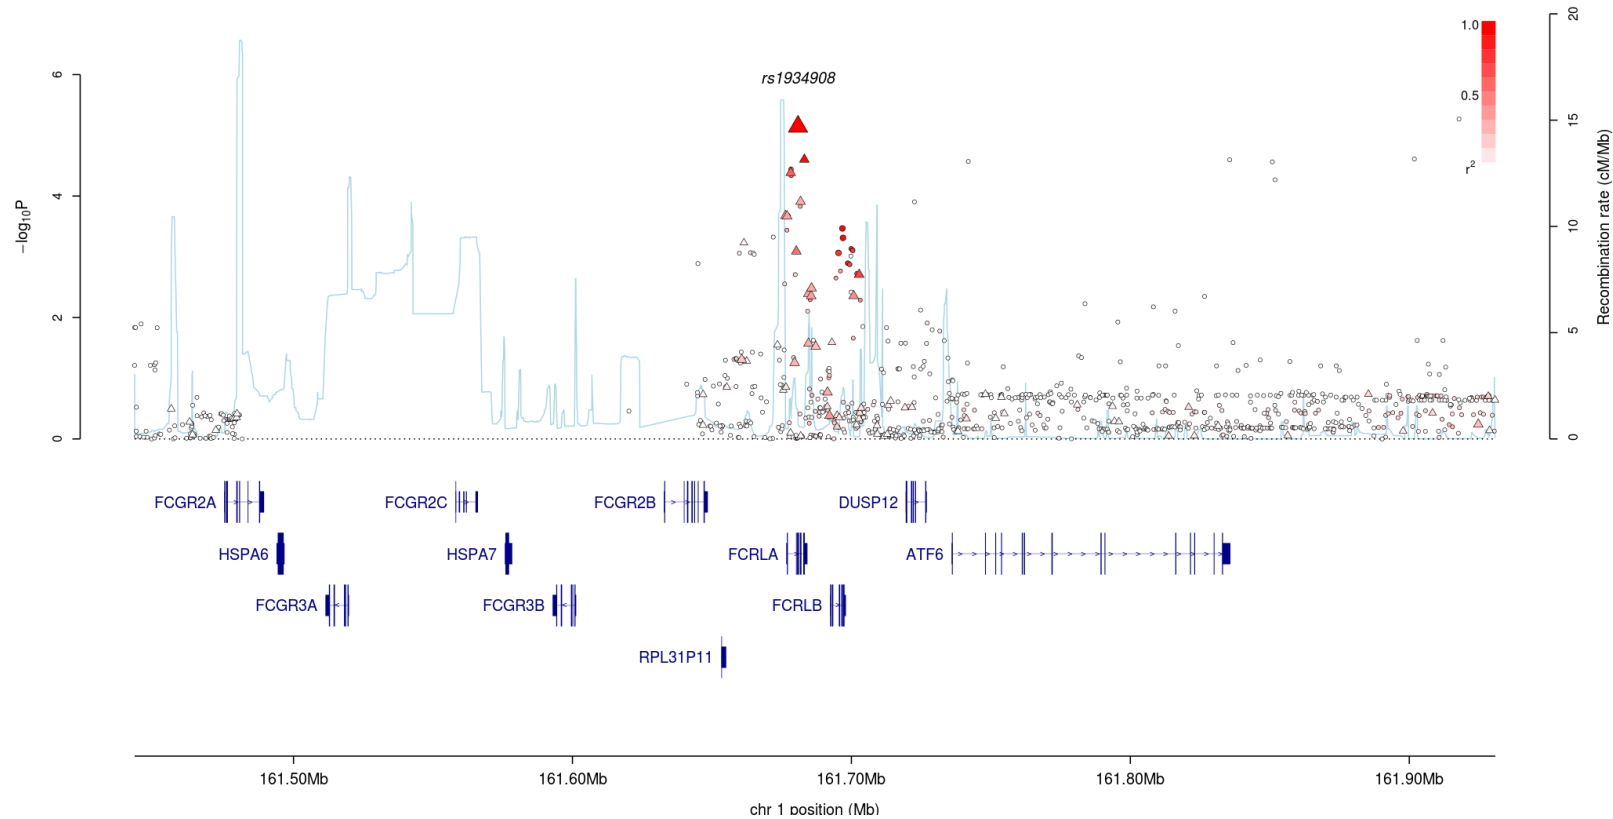

**Supplementary Figure 15: Regional plots of association results and recombination rates for the 1q23.3 (rs1934908) and 19q13.11 (rs197480) risk loci. Plots show association results of both genotyped (triangles) and imputed (circles) SNPs in the GWAS samples and recombination rates.  $-\log_{10}P$  values (y axes) of the SNPs are shown according to their chromosomal positions (x axes). The top genotyped SNP in each combined analysis is shown as a large diamond and is labeled by its rsID. The color intensity of each symbol reflects the extent of LD with the top genotyped SNP, white ( $r^2 = 0$ ) through to dark red ( $r^2 = 1.0$ ). Genetic recombination rates, estimated using HapMap samples from Utah residents of western and northern European ancestry (CEU), are shown with a light blue line. Physical positions are based on NCBI build 37 of the human genome. Also shown are the relative positions of genes and transcripts mapping to the region of association. Genes have been redrawn to show their relative positions; therefore, maps are not to physical scale.**

## 2q22.1 (rs61070260)

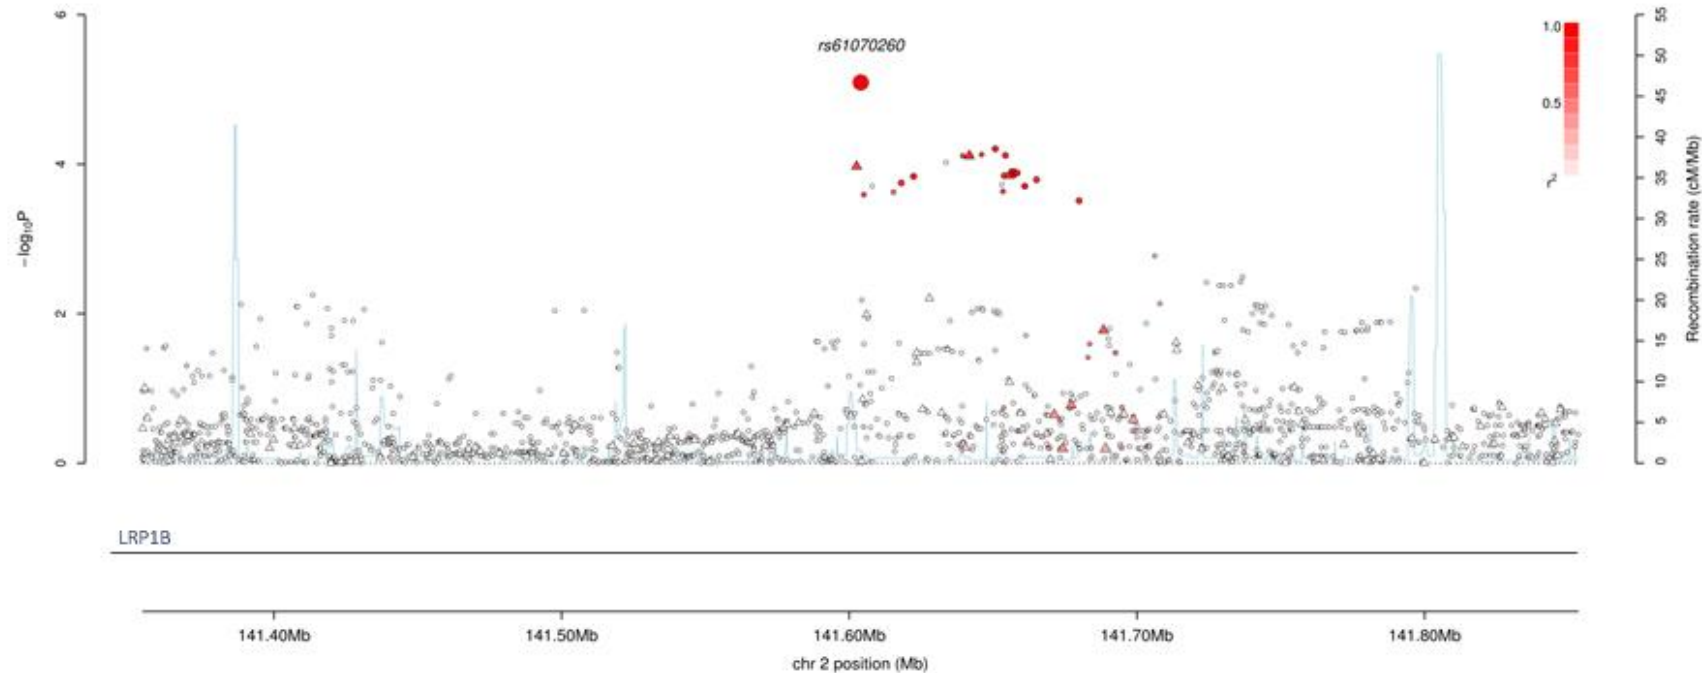

**Supplementary Figure 16: Regional plots of association results and recombination rates for 2q22.1 (rs61070260) risk loci.** Plots show association results of both genotyped (triangles) and imputed (circles) SNPs in the GWAS samples and recombination rates.  $-\log_{10} P$  values (y axes) of the SNPs are shown according to their chromosomal positions (x axes). The top genotyped SNP in each combined analysis is shown as a large diamond and is labeled by its rsID. The color intensity of each symbol reflects the extent of LD with the top genotyped SNP, white ( $r^2 = 0$ ) through to dark red ( $r^2 = 1.0$ ). Genetic recombination rates, estimated using HapMap samples from Utah residents of western and northern European ancestry (CEU), are shown with a light blue line. Physical positions are based on NCBI build 37 of the human genome. Also shown are the relative positions of genes and transcripts mapping to the region of association. Genes have been redrawn to show their relative positions; therefore, maps are not to physical scale.



### 3q13.31 (rs4682170)

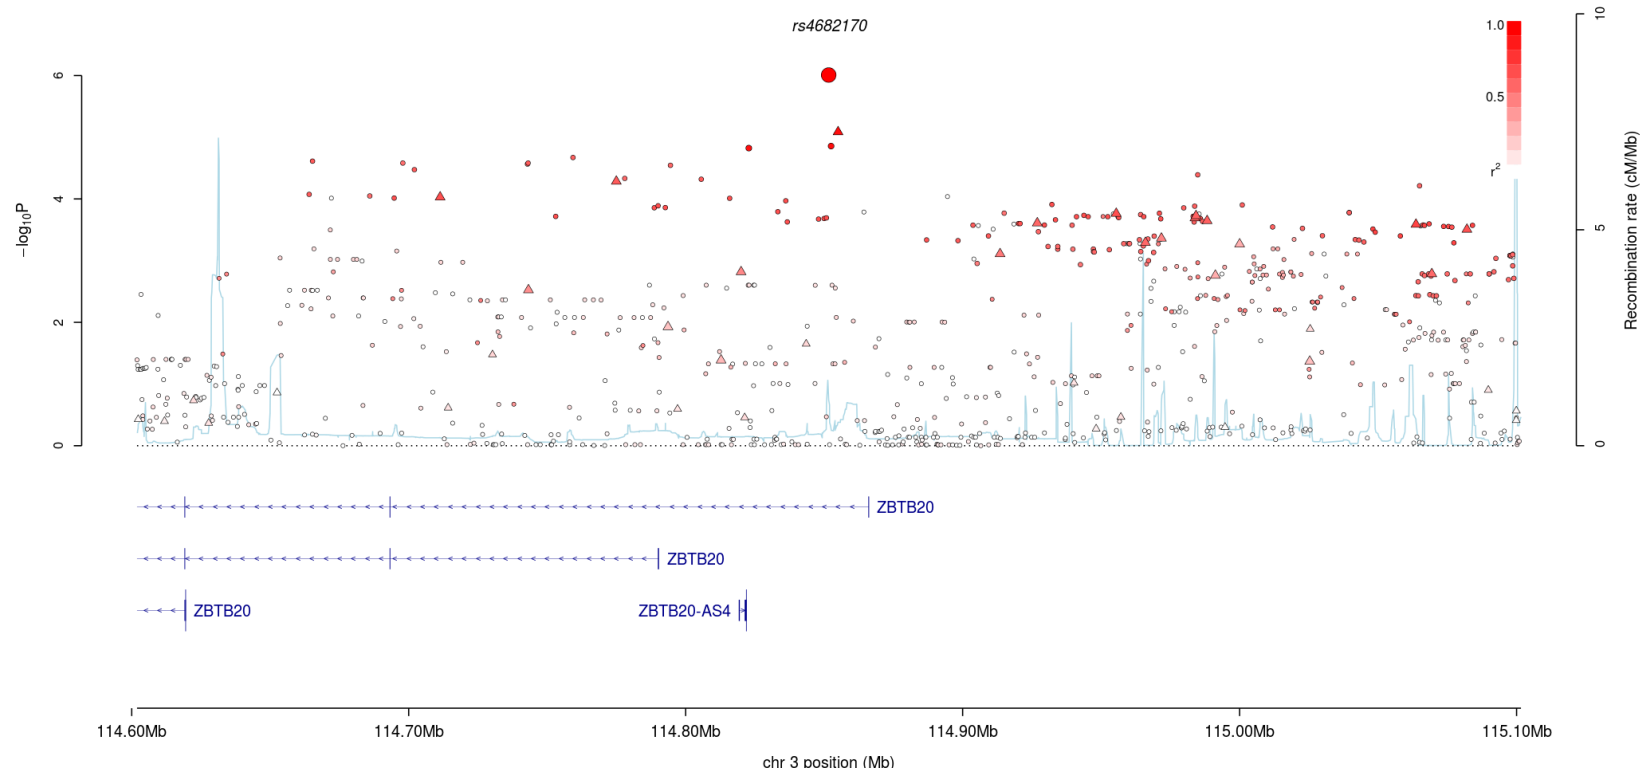

**Supplementary Figure 17: Regional plots of association results and recombination rates for the 3q13.31 (rs4682170) and 5q31.3 (rs2906053) risk loci. Plots show association results of both genotyped (triangles) and imputed (circles) SNPs in the GWAS samples and recombination rates.  $-\log_{10}P$  values (y axes) of the SNPs are shown according to their chromosomal positions (x axes). The top genotyped SNP in each combined analysis is shown as a large diamond and is labeled by its rsID. The color intensity of each symbol reflects the extent of LD with the top genotyped SNP, white ( $r^2 = 0$ ) through to dark red ( $r^2 = 1.0$ ). Genetic recombination rates, estimated using HapMap samples from Utah residents of western and northern European ancestry (CEU), are shown with a light blue line. Physical positions are based on NCBI build 37 of the human genome. Also shown are the relative positions of genes and transcripts mapping to the region of association. Genes have been redrawn to show their relative positions; therefore, maps are not to physical scale.**

## 5q31.3 (rs2906053)

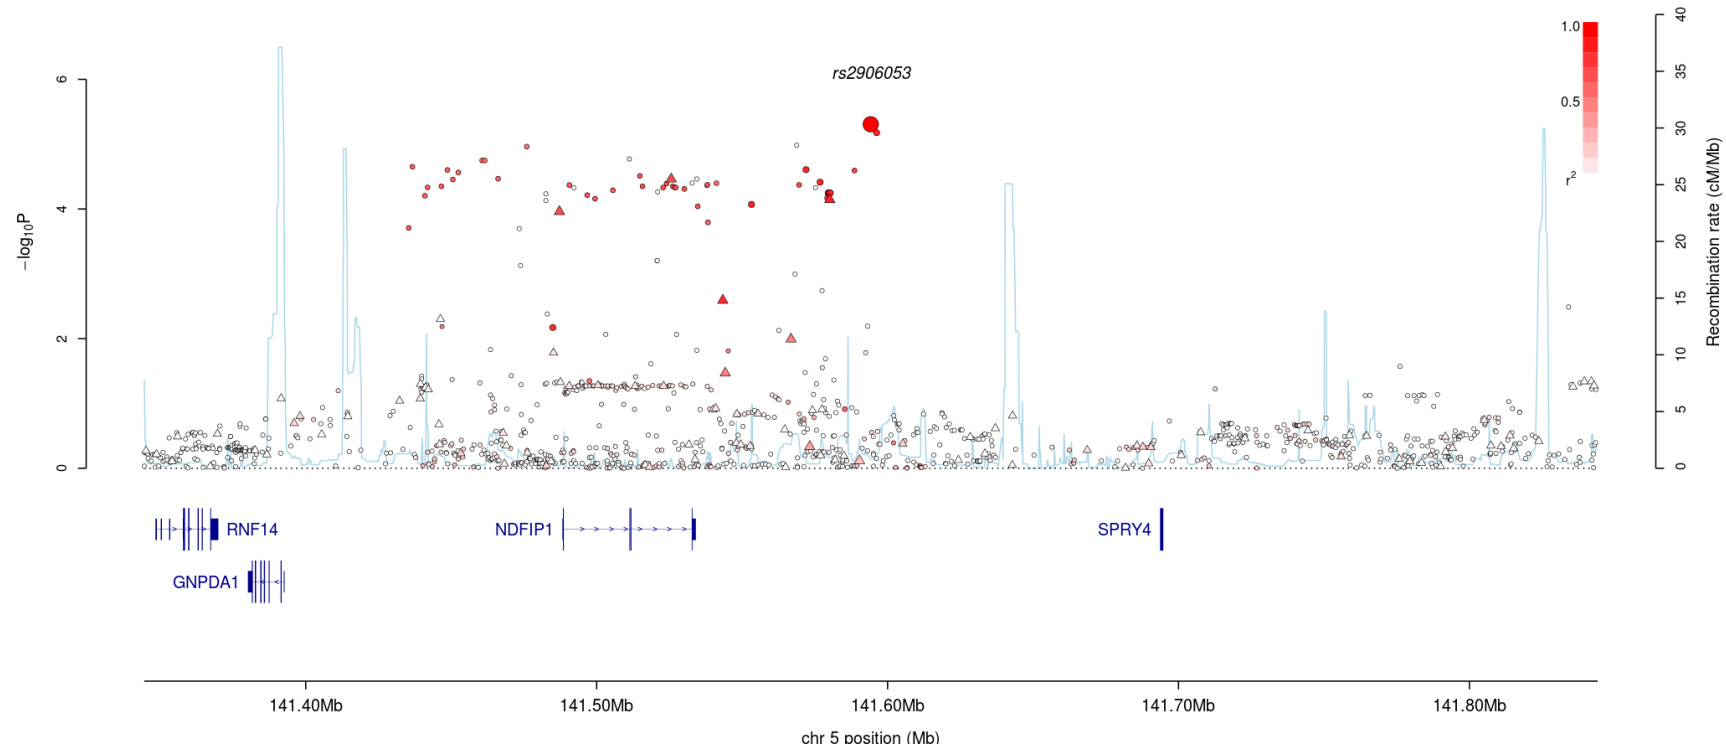

**Supplementary Figure 18: Regional plots of association results and recombination rates for 5q31.3 (rs2906053) risk loci. Plots show association results of both genotyped (triangles) and imputed (circles) SNPs in the GWAS samples and recombination rates.  $-\log_{10} P$  values (y axes) of the SNPs are shown according to their chromosomal positions (x axes). The top genotyped SNP in each combined analysis is shown as a large diamond and is labeled by its rsID. The color intensity of each symbol reflects the extent of LD with the top genotyped SNP, white ( $r^2 = 0$ ) through to dark red ( $r^2 = 1.0$ ). Genetic recombination rates, estimated using HapMap samples from Utah residents of western and northern European ancestry (CEU), are shown with a light blue line. Physical positions are based on NCBI build 37 of the human genome. Also shown are the relative positions of genes and transcripts mapping to the region of association. Genes have been redrawn to show their relative positions; therefore, maps are not to physical scale.**

## 18q21.32 (rs57942319)

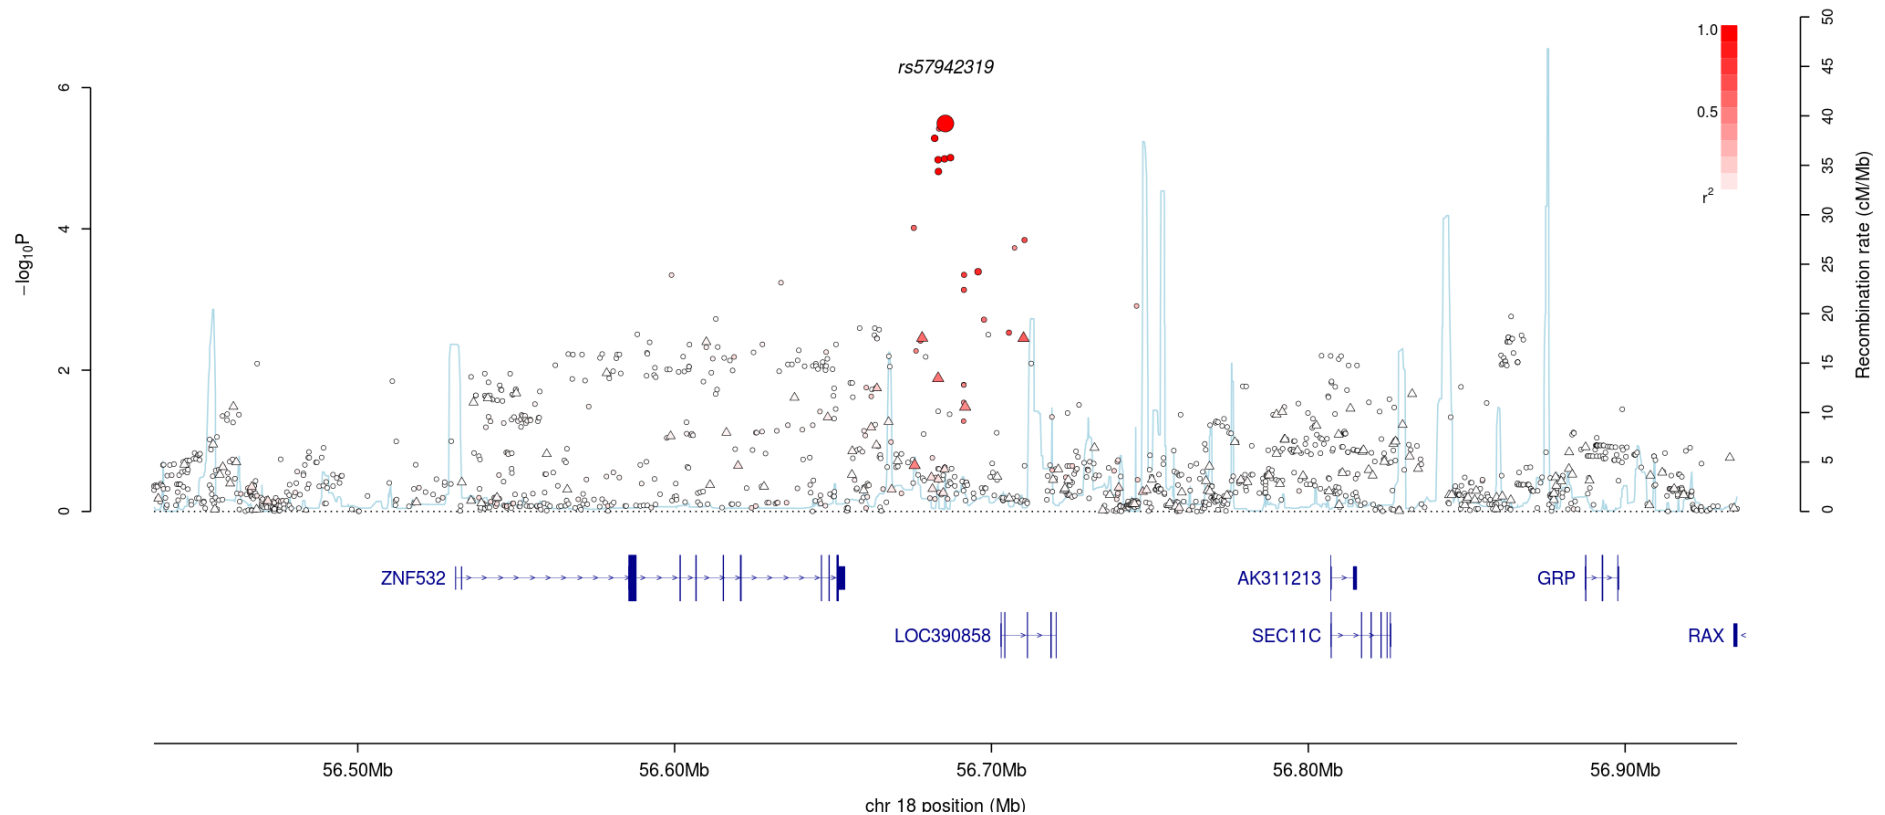

**Supplementary Figure 19: Regional plots of association results and recombination rates for the 18q21.32 (rs57942319) and 2q22.1 (rs61070260) risk loci. Plots show association results of both genotyped (triangles) and imputed (circles) SNPs in the GWAS samples and recombination rates.  $-\log_{10} P$  values (y axes) of the SNPs are shown according to their chromosomal positions (x axes). The top genotyped SNP in each combined analysis is shown as a large diamond and is labeled by its rsID. The color intensity of each symbol reflects the extent of LD with the top genotyped SNP, white ( $r^2 = 0$ ) through to dark red ( $r^2 = 1.0$ ). Genetic recombination rates, estimated using HapMap samples from Utah residents of western and northern European ancestry (CEU), are shown with a light blue line. Physical positions are based on NCBI build 37 of the human genome. Also shown are the relative positions of genes and transcripts mapping to the region of association. Genes have been redrawn to show their relative positions; therefore, maps are not to physical scale.**

## 19q13.11 (rs1974807)

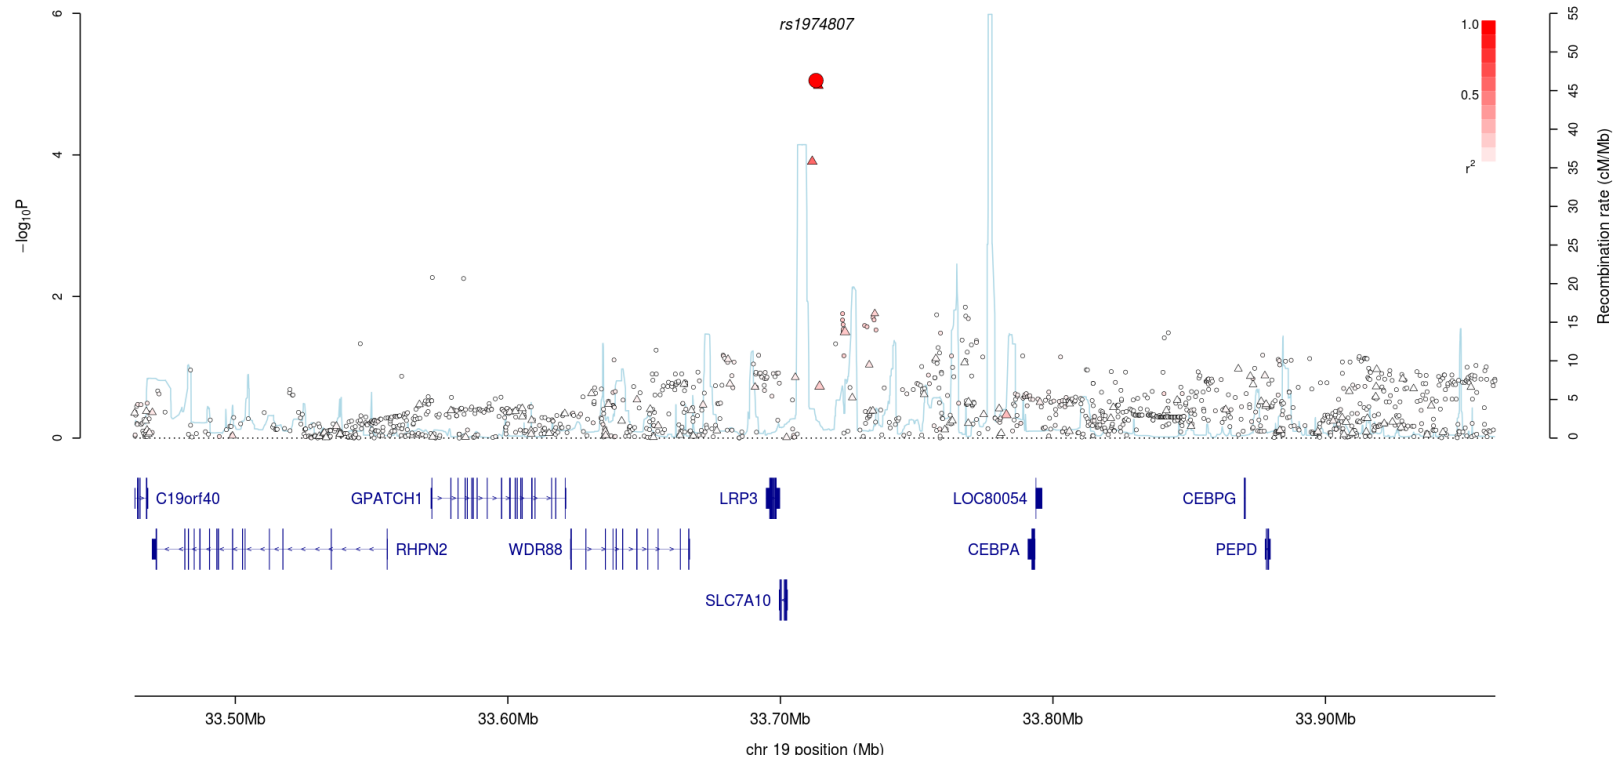

**Supplementary Figure 20: Regional plots of association results and recombination rates for the 19q13.11 (rs197480) risk loci. Plots show association results of both genotyped (triangles) and imputed (circles) SNPs in the GWAS samples and recombination rates.  $-\log_{10} P$  values (y axes) of the SNPs are shown according to their chromosomal positions (x axes). The top genotyped SNP in each combined analysis is shown as a large diamond and is labeled by its rsID. The color intensity of each symbol reflects the extent of LD with the top genotyped SNP, white ( $r^2 = 0$ ) through to dark red ( $r^2 = 1.0$ ). Genetic recombination rates, estimated using HapMap samples from Utah residents of western and northern European ancestry (CEU), are shown with a light blue line. Physical positions are based on NCBI build 37 of the human genome. Also shown are the relative positions of genes and transcripts mapping to the region of association. Genes have been redrawn to show their relative positions; therefore, maps are not to physical scale.**

a) UK-My9

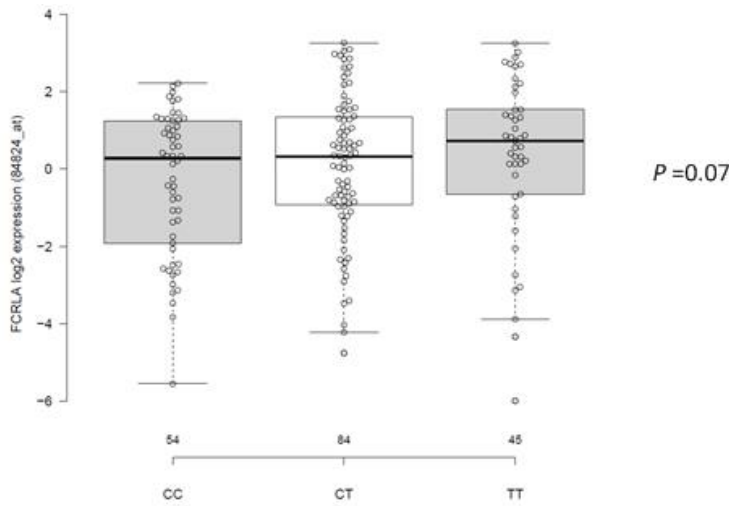

b) GER-GMMG

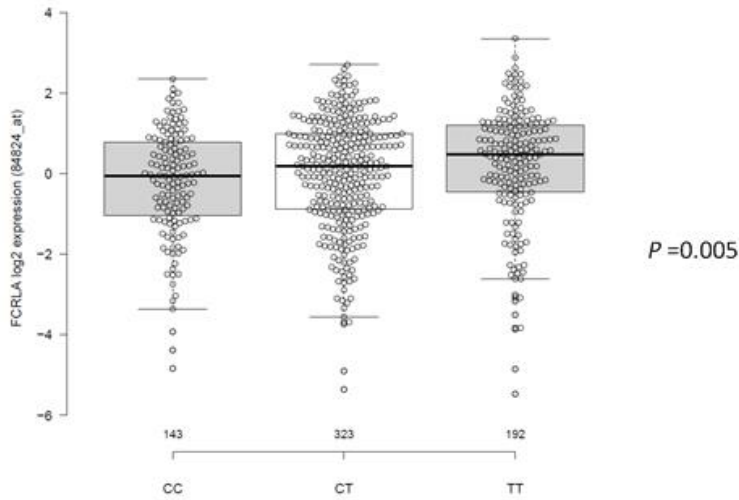

c) US-UAMS

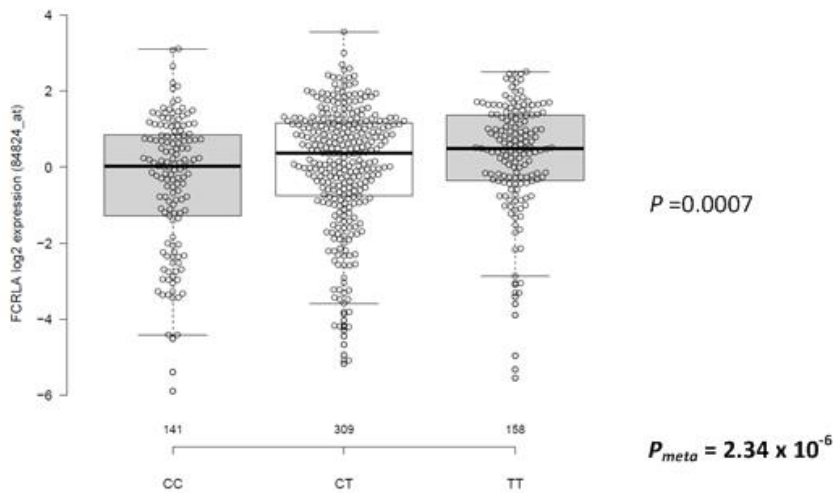

**Supplementary Figure 21: Relationship between Myeloma OS SNP rs1934908 and expression FCRLA.** Box plots show relationship of SNP genotype with Log<sub>2</sub> (gene expression). The central line in each box is the median, the bottom and top of the box are the first and third quartiles. The notches on each box are  $\pm 1.58 \times \text{interquartile range} / \sqrt{n}$ , defining the 95% confidence where the median are different. Bee swarm arranged circles are the data-points.

Univariate - UK-My9

| Chromosomal aberration                         | NA <sup>a</sup> | HR <sup>b</sup> (95% CI) <sup>c</sup> | P                       |
|------------------------------------------------|-----------------|---------------------------------------|-------------------------|
| Hyperdiploidy                                  | 529             | 0.76 (0.6-0.96)                       | 0.02                    |
| t4;14                                          | 500             | 1.59 (1.14-2.2)                       | 0.006                   |
| t6;14                                          | 513             | 0.89 (0.28-2.77)                      | 0.834                   |
| t11;14                                         | 501             | 0.92 (0.66-1.28)                      | 0.6                     |
| t14;16                                         | 503             | 2.11 (1.27-3.5)                       | 0.004                   |
| t14;20                                         | 508             | 2.73 (1.45-5.14)                      | 0.002                   |
| Gain 1q21                                      | 599             | 1.74 (1.35-2.23)                      | 1.95 x 10 <sup>-5</sup> |
| Del p53                                        | 522             | 1.87 (1.33-2.63)                      | 0.0004                  |
| rs12374648 - G                                 | 0               | 1.33 (1.14-1.55)                      | 0.0003                  |
| rs12374648 - G -adjusted for ISS and treatment | 0               | 1.45 (1.24-1.68)                      | 1.69 x 10 <sup>-6</sup> |

Multivariate - UK-My9

| Chromosomal aberration | HR (95% CI)      | P                      |
|------------------------|------------------|------------------------|
| t4;14                  | 1.48 (1.01-2.18) | 0.044                  |
| t14;16                 | 2.83 (1.59-5.04) | 4.1 x 10 <sup>-4</sup> |
| t14;20                 | 2.30 (1.06-4.99) | 0.03                   |
| Gain 1q21              | 1.48 (1.11-1.97) | 0.007                  |
| Del p53                | 1.88 (1.27-2.78) | 0.002                  |
| rs12374648 - G         | 1.48 (1.18-1.85) | 6.8 x 10 <sup>-4</sup> |

<sup>a</sup>Cases with missing data, <sup>b</sup>Hazards ratio. <sup>c</sup>95% Confidence Interval.

**Supplementary Table 1: Univariate and Multivariate Cox proportional hazards model of MM-OS at 6q25.1 (rs12374648) with major chromosomal aberrations in the UK-My9 cohort.**

| SNP                   | Base pair | Risk allele | Study           | RAF <sup>a</sup> | N    | Events | Genotypes |     |                                                          | HR <sup>b</sup> (95%CI) <sup>c</sup> | P                       |
|-----------------------|-----------|-------------|-----------------|------------------|------|--------|-----------|-----|----------------------------------------------------------|--------------------------------------|-------------------------|
| rs1934908(1q23.3)     | 161680868 | C           |                 |                  |      |        | CC        | CT  | TT                                                       |                                      |                         |
|                       |           |             | UK-My9          | 0.49             | 1165 | 512    | 282       | 579 | 304                                                      | 1.19 (1.05-1.34)                     | 0.0059                  |
|                       |           |             | UK-My11         | 0.47             | 877  | 201    | 195       | 435 | 247                                                      | 1.17 (0.96-1.42)                     | 0.1236                  |
|                       |           |             | GER-GMMG        | 0.47             | 511  | 156    | 116       | 244 | 151                                                      | 1.25 (1.0-1.56)                      | 0.0457                  |
|                       |           |             | US-UAMS         | 0.48             | 703  | 331    | 157       | 356 | 190                                                      | 1.22 (1.05-1.43)                     | 0.0106                  |
|                       |           |             | <b>Combined</b> |                  |      |        |           |     |                                                          |                                      | 7.17 x 10 <sup>-6</sup> |
|                       |           |             |                 |                  |      |        |           |     | <i>P</i> <sub>het</sub> =0.96, <i>I</i> <sup>2</sup> =0% |                                      |                         |
| rs1974807(19q13.11)   | 33713058  | C           |                 |                  |      |        | CC        | AC  | AA                                                       |                                      |                         |
|                       |           |             | UK-My9          | 0.19             | 1146 | 503    | 49        | 348 | 749                                                      | 1.18 (1.02-1.37)                     | 0.0244                  |
|                       |           |             | UK-My11         | 0.22             | 861  | 197    | 35        | 315 | 511                                                      | 1.35 (1.07-1.7)                      | 0.0107                  |
|                       |           |             | GER-GMMG        | 0.21             | 500  | 154    | 23        | 166 | 311                                                      | 1.24 (0.93-1.64)                     | 0.1384                  |
|                       |           |             | US-UAMS         | 0.21             | 693  | 326    | 28        | 238 | 427                                                      | 1.28 (1.07-1.53)                     | 0.0083                  |
|                       |           |             | <b>Combined</b> |                  |      |        |           |     |                                                          |                                      | 8.88 x 10 <sup>-6</sup> |
|                       |           |             |                 |                  |      |        |           |     | <i>P</i> <sub>het</sub> =0.8, <i>I</i> <sup>2</sup> =0%  |                                      |                         |
| rs2906053 (5q31.3)    | 141594215 | C           |                 |                  |      |        | CC        | CT  | TT                                                       |                                      |                         |
|                       |           |             | UK-My9          | 0.11             | 1153 | 504    | 13        | 232 | 908                                                      | 1.43 (1.19-1.72)                     | 0.0001                  |
|                       |           |             | UK-My11         | 0.11             | 870  | 201    | 16        | 151 | 703                                                      | 1.46 (1.1-1.92)                      | 0.0077                  |
|                       |           |             | GER-GMMG        | 0.11             | 503  | 155    | 4         | 106 | 393                                                      | 1.12 (0.8-1.58)                      | 0.5081                  |
|                       |           |             | US-UAMS         | 0.11             | 672  | 316    | 9         | 131 | 532                                                      | 1.18 (0.92-1.51)                     | 0.2014                  |
|                       |           |             | <b>Combined</b> |                  |      |        |           |     |                                                          |                                      | 4.93 x 10 <sup>-6</sup> |
|                       |           |             |                 |                  |      |        |           |     | <i>P</i> <sub>het</sub> =0.41, <i>I</i> <sup>2</sup> =0% |                                      |                         |
| rs4682170 (3q13.31)   | 114851633 | A           |                 |                  |      |        | AA        | AC  | CC                                                       |                                      |                         |
|                       |           |             | UK-My9          | 0.15             | 1142 | 502    | 23        | 306 | 813                                                      | 1.33 (1.12-1.58)                     | 0.0013                  |
|                       |           |             | UK-My11         | 0.15             | 850  | 197    | 21        | 206 | 623                                                      | 1.29 (0.99-1.69)                     | 0.0579                  |
|                       |           |             | GER-GMMG        | 0.15             | 496  | 150    | 7         | 133 | 356                                                      | 1.05 (0.77-1.43)                     | 0.7765                  |
|                       |           |             | US-UAMS         | 0.13             | 686  | 319    | 16        | 151 | 519                                                      | 1.47 (1.19-1.81)                     | 0.0003                  |
|                       |           |             | <b>Combined</b> |                  |      |        |           |     |                                                          |                                      | 9.8 x 10 <sup>-7</sup>  |
|                       |           |             |                 |                  |      |        |           |     | <i>P</i> <sub>het</sub> =0.36, <i>I</i> <sup>2</sup> =7% |                                      |                         |
| rs57942319 (18q21.32) | 56685448  | A           |                 |                  |      |        | AA        | AG  | GG                                                       |                                      |                         |
|                       |           |             | UK-My9          | 0.08             | 1163 | 510    | 8         | 171 | 984                                                      | 1.35 (1.1-1.67)                      | 0.0050                  |
|                       |           |             | UK-My11         | 0.08             | 873  | 200    | 8         | 126 | 739                                                      | 1.37 (1-1.88)                        | 0.0493                  |
|                       |           |             | GER-GMMG        | 0.10             | 509  | 156    | 7         | 83  | 419                                                      | 1.26 (0.87-1.81)                     | 0.2209                  |
|                       |           |             | US-UAMS         | 0.08             | 700  | 331    | 4         | 105 | 591                                                      | 1.5 (1.15-1.95)                      | 0.0026                  |
|                       |           |             | <b>Combined</b> |                  |      |        |           |     |                                                          |                                      | 3.22 x 10 <sup>-6</sup> |
|                       |           |             |                 |                  |      |        |           |     | <i>P</i> <sub>het</sub> =0.88, <i>I</i> <sup>2</sup> =0% |                                      |                         |
| rs61070260 (2q22.1)   | 141603995 | A           |                 |                  |      |        | AA        | AG  | GG                                                       |                                      |                         |
|                       |           |             | UK-My9          | 0.06             | 1132 | 500    | 3         | 120 | 1009                                                     | 1.38 (1.06-1.79)                     | 0.0153                  |
|                       |           |             | UK-My11         | 0.06             | 860  | 200    | 1         | 106 | 753                                                      | 1.3 (0.89-1.9)                       | 0.1721                  |
|                       |           |             | GER-GMMG        | 0.07             | 499  | 152    | 2         | 65  | 432                                                      | 1.52 (1.05-2.21)                     | 0.0279                  |
|                       |           |             | US-UAMS         | 0.07             | 685  | 324    | 2         | 91  | 592                                                      | 1.52 (1.14-2.04)                     | 0.0048                  |
|                       |           |             | <b>Combined</b> |                  |      |        |           |     |                                                          |                                      | 8.05 x 10 <sup>-6</sup> |
|                       |           |             |                 |                  |      |        |           |     | <i>P</i> <sub>het</sub> =0.9, <i>I</i> <sup>2</sup> =0%  |                                      |                         |

<sup>a</sup>Risk allele frequency (RAF). <sup>b</sup>Hazards ratio. <sup>c</sup>95% Confidence Interval.

**Supplementary Table 2: Summary results for SNPs suggestive associations with MM-OS.** *P*-values assessed by a cox proportional hazards model. Individual cohort results were combined by fixed odds meta-analysis.

| MM OS associations | Region                 |             |            | 6q25.1                  |        | 1q23.3                   | 19q13.11                                |                         | 5q31.3                  | 3q13.31                 |                        | 18q21.32                | 2q22.1                  |
|--------------------|------------------------|-------------|------------|-------------------------|--------|--------------------------|-----------------------------------------|-------------------------|-------------------------|-------------------------|------------------------|-------------------------|-------------------------|
|                    | SNP                    |             |            | rs12374648              |        | rs1934908                | rs1974807                               |                         | rs2906053               | rs4682170               |                        | rs57942319              | rs61070260              |
|                    | CHR                    |             |            | 6                       |        | 1                        | 19                                      |                         | 5                       | 3                       |                        | 18                      | 2                       |
|                    | BP                     |             |            | 151529369               |        | 161680868                | 33713058                                |                         | 141594215               | 114851633               |                        | 56685448                | 141603995               |
|                    | A1                     |             |            | G                       |        | C                        | C                                       |                         | C                       | A                       |                        | A                       | A                       |
|                    | A2                     |             |            | A                       |        | T                        | A                                       |                         | T                       | C                       |                        | G                       | G                       |
|                    | P                      |             |            | 4.69 x 10 <sup>-9</sup> |        | 7.17 x 10 <sup>-6</sup>  | 8.88 x 10 <sup>-6</sup>                 |                         | 4.93 x 10 <sup>-6</sup> | 9.80 x 10 <sup>-7</sup> |                        | 3.22 x 10 <sup>-6</sup> | 8.05 x 10 <sup>-6</sup> |
|                    | Proximal genes         |             |            | MTHFD1L                 | AKAP12 | FCRLA                    | LRP3                                    | SLC7A10                 | NDFIP1                  | ZBTB20                  | SEMA5A                 | ZNF532                  | LRP1B                   |
|                    | Typed SNP in LD        |             |            | rs9478986               |        | rs1934908                | rs8106493                               |                         | rs2961694               | rs6793973               |                        | rs8093617               | rs16844912              |
|                    |                        | Tissue type | Study size |                         |        |                          |                                         |                         |                         |                         |                        |                         |                         |
| cis-eQTL           | GTEx portal            | Mutiple     | 1,421      | NS                      | NS     | NS                       | NS                                      | NS                      | NS                      | NS                      | NS                     | NS                      | NS                      |
|                    | Blood eQTLs            | Whole blood | 5,133      | NA                      | NS     | NS                       | NS                                      | NS                      | NS                      | NS                      | NS                     | NS                      | NS                      |
|                    | MuTHER - LCLs          | LCLs        | 850        | NA                      | 0.34   | 1.12 x 10 <sup>-7</sup>  | 0.72                                    | 0.17                    | 0.55                    | NA                      | NA                     | NA                      | 0.82                    |
|                    | MuTHER - Adipose       | Adipose     | 850        | NA                      | 0.23   | 0.52                     | 0.063                                   | 3.06 x 10 <sup>-9</sup> | 0.32                    | NA                      | NA                     | NA                      | 0.34                    |
|                    | MuTHER - Skin          | Skin        | 850        | NA                      | 0.29   | 3.12 x 10 <sup>-6</sup>  | 0.943                                   | 0.17                    | 0.41                    | NA                      | NA                     | NA                      | 0.68                    |
|                    | SCAN                   | LCLs        | 176        | NS                      | NS     | NS                       | NS                                      | NS                      | NS                      | NS                      | 7.0 x 10 <sup>-5</sup> | NS                      | NS                      |
| sQTL               | Framingham Heart Study | Whole blood | 5,257      | NA                      | NA     | 1.24 x 10 <sup>-46</sup> | NA                                      | NA                      | NA                      | NA                      | NA                     | NA                      | NA                      |
| Regulatory motifs  | HaploReg v3            |             |            | Bound by TCF4           |        | 11 altered motifs        | adipose enhancer, altered LUN-1, SETDB1 |                         | 12 altered motifs       | 6 altered motifs        |                        | Bound by MAFK           | 4 altered motifs        |
|                    | Regulomedb             |             |            | TF binding, DNase peak  |        | NS                       | TF binding                              |                         | NS                      | NS                      |                        | TF binding              | NA                      |

**Supplementary Table 3: MM-OS SNPs in eQTL, mQTL and regulatory motif databases.** Databases included in Table are: GTEx<sup>1</sup>, Blood eQTL<sup>2</sup>, MuTHER studies<sup>3</sup>, Framingham heart study<sup>4</sup>, SCAN<sup>5</sup>, HaploReg<sup>6</sup> and Regulomedb<sup>7</sup>. eQTLs are labelled Non-significant (NS), where the eQTL value was not reported by database due to the weakness of the association. eQTLs are labelled Not applicable (NA) where expression on the gene was not present in the given cell type.



| SNP        | CHR      | Base pair | A1 | A2 | N | P         | P(R)      | HR <sup>a</sup> | HR(R)  | Q <sup>b</sup> | I <sup>2c</sup> |
|------------|----------|-----------|----|----|---|-----------|-----------|-----------------|--------|----------------|-----------------|
| rs12374648 | 6q25.1   | 151529369 | G  | A  | 4 | 0.0001149 | 0.09487   | 1.1716          | 1.1393 | 0.0208         | 69.25           |
| rs1934908  | 1q23.3   | 161680868 | C  | T  | 4 | 0.0001936 | 0.0006601 | 1.1258          | 1.1272 | 0.3185         | 14.71           |
| rs1974807  | 19q13.11 | 33713058  | C  | A  | 4 | 0.003772  | 0.003772  | 1.1221          | 1.1221 | 0.8163         | 0               |
| rs2906053  | 5q31.3   | 141594215 | C  | T  | 4 | 0.01526   | 0.01526   | 1.133           | 1.133  | 0.7085         | 0               |
| rs4682170  | 3q13.31  | 114851633 | A  | C  | 4 | 0.1308    | 0.1308    | 1.0722          | 1.0722 | 0.7185         | 0               |
| rs57942319 | 18q21.32 | 56685448  | A  | G  | 4 | 0.004558  | 0.004558  | 1.1721          | 1.1721 | 0.6818         | 0               |
| rs61070260 | 2q22.1   | 141603995 | A  | G  | 4 | 0.02035   | 0.02035   | 1.1675          | 1.1675 | 0.5062         | 0               |

<sup>a</sup>Hazards ratio, <sup>b</sup>p-value for Cochran's Q statistic, <sup>c</sup>Heterogeneity index

**Supplementary Table 4: Relationship between suggestive associations with MM-OS SNPs and progression free survival.** P-values assessed by a cox proportional hazards model. Individual cohort results were combined by fixed odds meta-analysis.

| SNP         | CHR | Nearest gene | Base pair | A1 | A2 | Meta  |      |       | UK-My9 |       |                  | UK-My11 |       |                  | GER-GMMG |       |                  | US-UAMS |       |                  |
|-------------|-----|--------------|-----------|----|----|-------|------|-------|--------|-------|------------------|---------|-------|------------------|----------|-------|------------------|---------|-------|------------------|
|             |     |              |           |    |    | P     | HR   | $I^2$ | MAF    | P     | HR (95%CI)       | MAF     | P     | HR (95%CI)       | MAF      | P     | HR (95%CI)       | MAF     | P     | HR (95%CI)       |
| rs12622528* | 2   | ST6GAL2      | 107649440 | T  | C  | 0.402 | 1.04 | 5     | 0.33   | 0.075 | 1.13 (0.99-1.29) | 0.33    | 0.734 | 1.04 (0.84-1.29) | 0.34     | 0.827 | 0.97 (0.77-1.23) | 0.35    | 0.459 | 0.94 (0.8-1.11)  |
| rs6746082   | 2   | DNTB         | 25659244  | C  | A  | 0.463 | 1.04 | 47    | 0.18   | 0.166 | 0.89 (0.75-1.05) | 0.18    | 0.199 | 1.18 (0.92-1.53) | 0.17     | 0.289 | 1.17 (0.88-1.55) | 0.18    | 0.212 | 1.13 (0.93-1.38) |
| rs1052501   | 3   | ULK4         | 41925398  | C  | T  | 0.835 | 0.99 | 0     | 0.20   | 0.847 | 1.02 (0.87-1.19) | 0.20    | 0.675 | 0.95 (0.74-1.22) | 0.19     | 0.183 | 0.81 (0.59-1.11) | 0.19    | 0.610 | 1.05 (0.87-1.27) |
| rs10936599  | 3   | TERC         | 169492101 | T  | C  | 0.601 | 1.03 | 0     | 0.20   | 0.775 | 1.02 (0.88-1.19) | 0.20    | 0.479 | 1.09 (0.86-1.39) | 0.20     | 0.691 | 1.06 (0.8-1.39)  | 0.23    | 0.858 | 0.98 (0.81-1.19) |
| rs56219066  | 5   | ELL2         | 95242931  | C  | T  | 0.603 | 1.03 | 0     | 0.24   | 0.499 | 1.05 (0.91-1.21) | 0.21    | 0.978 | 1.00 (0.79-1.26) | 0.22     | 0.542 | 1.08 (0.82-1.43) | 0.23    | 0.797 | 0.98 (0.81-1.17) |
| rs2285803   | 6   | POU5F1       | 31107258  | T  | C  | 0.169 | 1.06 | 0     | 0.32   | 0.209 | 1.09 (0.95-1.25) | 0.31    | 0.242 | 1.13 (0.92-1.39) | 0.36     | 0.269 | 1.14 (0.9-1.45)  | 0.32    | 0.546 | 0.95 (0.81-1.12) |
| rs4487645   | 7   | DNAH11       | 21938240  | A  | C  | 0.895 | 0.99 | 0     | 0.28   | 0.394 | 0.94 (0.82-1.08) | 0.31    | 0.376 | 1.1 (0.89-1.34)  | 0.25     | 0.774 | 1.04 (0.81-1.32) | 0.29    | 0.897 | 0.99 (0.83-1.17) |
| rs4273077   | 17  | TNFRSF13B    | 16849139  | G  | A  | 0.742 | 0.98 | 64    | 0.12   | 0.788 | 1.03 (0.85-1.23) | 0.12    | 0.037 | 0.68 (0.47-0.98) | 0.15     | 0.085 | 1.29 (0.97-1.73) | 0.11    | 0.287 | 0.87 (0.68-1.12) |
| rs877529    | 22  | CBX7         | 39542292  | A  | G  | 0.519 | 0.97 | 0     | 0.49   | 0.441 | 1.05 (0.93-1.19) | 0.50    | 0.606 | 1.05 (0.86-1.28) | 0.44     | 0.407 | 1.1 (0.88-1.39)  | 0.49    | 0.676 | 1.03 (0.89-1.21) |

<sup>a</sup>Minor allele frequency (MAF). <sup>b</sup>Hazards ratio. <sup>c</sup>95% Confidence Interval, \* R2=1, proxy for rs12614346

**Supplementary Table 5: Relationship between susceptibility SNPs for MM and MM-OS.** *P*-values assessed by a cox proportional hazards model.

Individual cohort results were combined by fixed odds meta-analysis.

Trend

|                 | RAF <sup>a</sup> | HR <sup>b</sup> | 95% CI <sup>c</sup> | <i>P</i> |                            |
|-----------------|------------------|-----------------|---------------------|----------|----------------------------|
| UK-My9          | 0.062            | 0.92            | 0.71-1.19           | 0.539    |                            |
| UK-My11         | 0.048            | 1.47            | 0.97-2.26           | 0.069    |                            |
| GER-GMMG        | 0.059            | 1.03            | 0.67-1.60           | 0.878    |                            |
| US-UAMS         | 0.057            | 0.86            | 0.62-1.19           | 0.37     |                            |
| <b>Combined</b> |                  | 0.99            | 0.84 -1.19          | 0.921    | <i>I</i> <sup>2</sup> =33% |

AA vs AT + TT

|                 | HR   | 95% CI    | <i>P</i> |                            |
|-----------------|------|-----------|----------|----------------------------|
| UK-My9          | 0.97 | 0.85-1.10 | 0.642    |                            |
| UK-My11         | 1.23 | 0.99-1.52 | 0.062    |                            |
| GER-GMMG        | 1.06 | 0.83-1.36 | 0.635    |                            |
| US-UAMS         | 0.94 | 0.80-1.11 | 0.486    |                            |
| <b>Combined</b> | 1.01 | 0.93-1.10 | 0.794    | <i>I</i> <sup>2</sup> =31% |

<sup>a</sup>Risk allele frequency (RAF). <sup>b</sup>Hazards ratio. <sup>c</sup>95% Confidence Interval

**Supplementary Table 6: Association statistics for the SNP at locus 16p13 rs72773978.** *P*-values assessed by a cox proportional hazards model. Individual cohort results were combined by fixed odds meta-analysis.

## Supplementary References

1. Consortium, G.T. Human genomics. The Genotype-Tissue Expression (GTEx) pilot analysis: multitissue gene regulation in humans. *Science* **348**, 648-60 (2015).
2. Westra, H.J. *et al.* Systematic identification of trans eQTLs as putative drivers of known disease associations. *Nat Genet* **45**, 1238-43 (2013).
3. Nica, A.C. *et al.* The architecture of gene regulatory variation across multiple human tissues: the MuTHER study. *PLoS Genet* **7**, e1002003 (2011).
4. Zhang, X. *et al.* Identification of common genetic variants controlling transcript isoform variation in human whole blood. *Nat Genet* **47**, 345-52 (2015).
5. Gamazon, E.R. *et al.* SCAN: SNP and copy number annotation. *Bioinformatics* **26**, 259-62 (2010).
6. Ward, L.D. & Kellis, M. HaploReg: a resource for exploring chromatin states, conservation, and regulatory motif alterations within sets of genetically linked variants. *Nucleic Acids Res* **40**, D930-4 (2012).
7. Boyle, A.P. *et al.* Annotation of functional variation in personal genomes using RegulomeDB. *Genome Res* **22**, 1790-7 (2012).
